# Supplementary material for: Novel spirocyclic tranylcypromine derivatives as lysine-specific demethylase 1 (LSD1) inhibitors
Source: PubMed Central journal article supplement (PMC9077246; doi:10.1039/c7ra13097j), 2018-01-05

## Supplementary Information

### Novel Spirocyclic Tranylcpromine Derivatives as LSD1 Inhibitors

Ying Shi<sup>a,†</sup>, Yan-Ran Wu<sup>a,†</sup>, Ming-Bo Su<sup>b,†</sup>, Dong-Hao Shen<sup>a</sup>, Hendra Gunosewoyo<sup>c</sup>, Fan Yang<sup>a</sup>, Jia Li<sup>b</sup>, Jie Tang<sup>d</sup>, Yu-Bo Zhou<sup>b,\*</sup>, and Li-Fang Yu<sup>a,\*</sup>

\*Corresponding authors

<sup>a</sup> Shanghai Engineering Research Center of Molecular Therapeutics and New Drug Development, School of Chemistry and Molecular Engineering, East China Normal University, 3663 North Zhongshan Road, Shanghai 200062, China

<sup>b</sup> CAS Key Laboratory of Receptor Research, National Center for Drug Screening, Shanghai Institute of Materia Medica, Chinese Academy of Sciences, 189 Guo Shou Jing Road, Shanghai 201203, China

<sup>c</sup> School of Pharmacy, Faculty of Health Sciences, Curtin University, Bentley, Perth, WA 6102, Australia

<sup>d</sup> Shanghai Key Laboratory of Green Chemistry and Chemical Process, School of Chemistry and Molecular Engineering, East China Normal University, 3663 North Zhongshan Road, Shanghai 200062, China

<sup>†</sup>These authors contributed equally

## Contents

Table 1

<sup>1</sup>H NMR, <sup>13</sup>C NMR spectrum for 8a, 8b,13a-25a,13b-25b,28a-32a,28b-30b

<sup>1</sup>H-<sup>1</sup>H COESY and <sup>1</sup>H-<sup>1</sup>H NOESY spectrum for 8a,8b

**Table 1.** NMR Data of **8a** and **8b** in CD<sub>3</sub>OD (400 MHz).

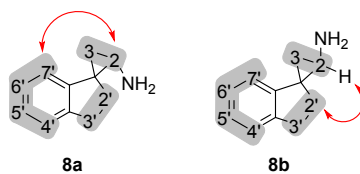

(Gray Zones <sup>1</sup>H, <sup>1</sup>H COSY; Red Arrows <sup>1</sup>H, <sup>1</sup>H NOESY).

| Cmpd      | Pos. | Type                   | $\delta_{\text{H}}$ | $m$ ( $J$ in Hz)       | COSY   | NOESY    |
|-----------|------|------------------------|---------------------|------------------------|--------|----------|
| <b>8a</b> | 2'   | CH <sub>2</sub>        | 2.35–2.20           | m                      | 3'     | 3'       |
|           | 3'   | CH <sub>2</sub>        | 3.14                | t (7.6)                | 2'     | 2', 4'   |
|           | 4'   | CH                     | 7.22                | d (6.4)                | 5'     | 3', 5'   |
|           | 5'   | CH                     | 7.18–7.12           | m                      | 4', 6' | 4'       |
|           | 6'   | CH                     | 7.18–7.12           | m                      | 5', 7' | 7'       |
|           | 7'   | CH                     | 6.76                | d (6.4)                | 6'     | 2, 3, 6, |
|           | 2    | CH                     | 2.88                | dd (7.2, 4.8)          | 3      | 3, 7'    |
|           | 3    | CH <sub>2</sub> (H, H) | 1.42, 1.29          | t (7.2), t (5.4)       | 2      | 2, 7'    |
| <b>8b</b> | 2'   | CH <sub>2</sub> (H, H) | 2.38–2.30, 1.97     | m, dd (12.6, 7.8)      | 3'     | 2, 3'    |
|           | 3'   | CH <sub>2</sub> (H, H) | 3.18–3.10, 2.97     | m, dd (15.6, 8.8)      | 2'     | 2'       |
|           | 4'   | CH                     | 7.32                | d (5.2)                | 5'     | 5'       |
|           | 5'   | CH                     | 7.26–7.21           | m                      | 4', 6' | 4'       |
|           | 6'   | CH                     | 7.26–7.21           | m                      | 5', 7' | 7'       |
|           | 7'   | CH                     | 7.08–7.06           | m                      | 6'     | 3, 6'    |
|           | 2    | CH                     | 2.88                | dd (7.8, 4.6)          | 3      | 2', 3    |
|           | 3    | CH <sub>2</sub> (H, H) | 1.51, 1.43          | dd (6.8, 4.8), t (7.4) | 2      | 2, 7'    |

<sup>1</sup>H NMR (400 MHz, CD<sub>3</sub>OD) and <sup>13</sup>C NMR (101MHz, CD<sub>3</sub>OD) spectrum for **8a**

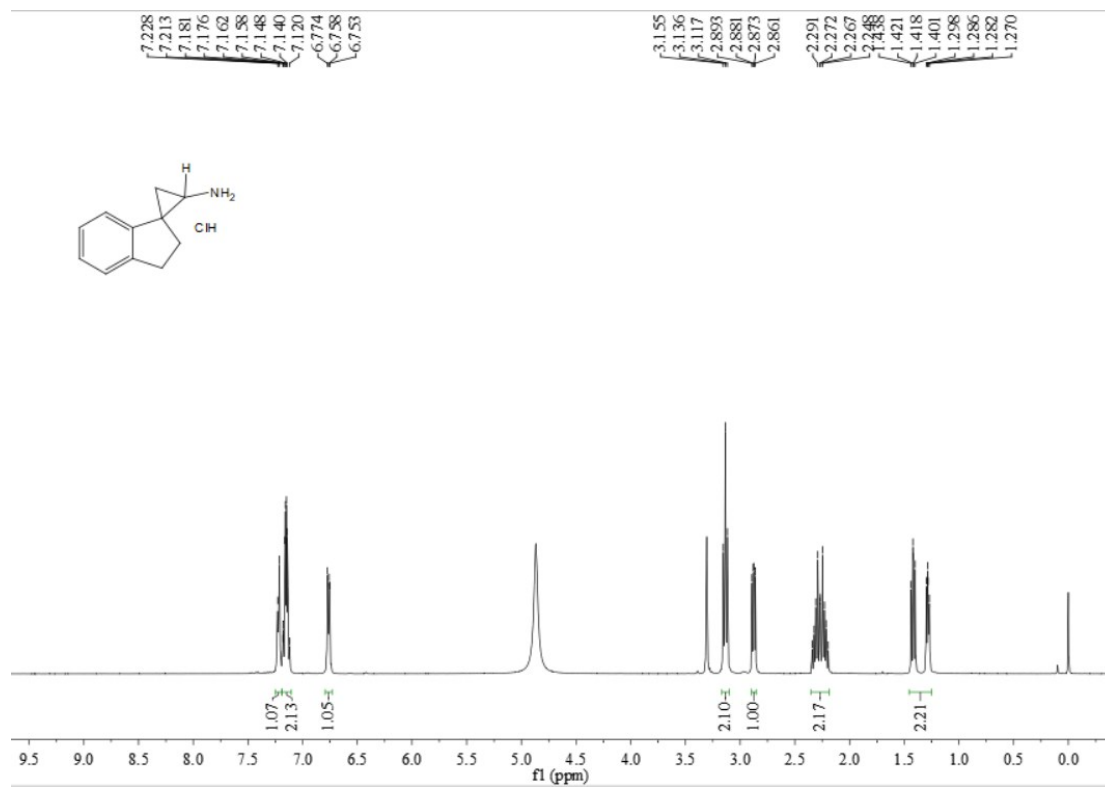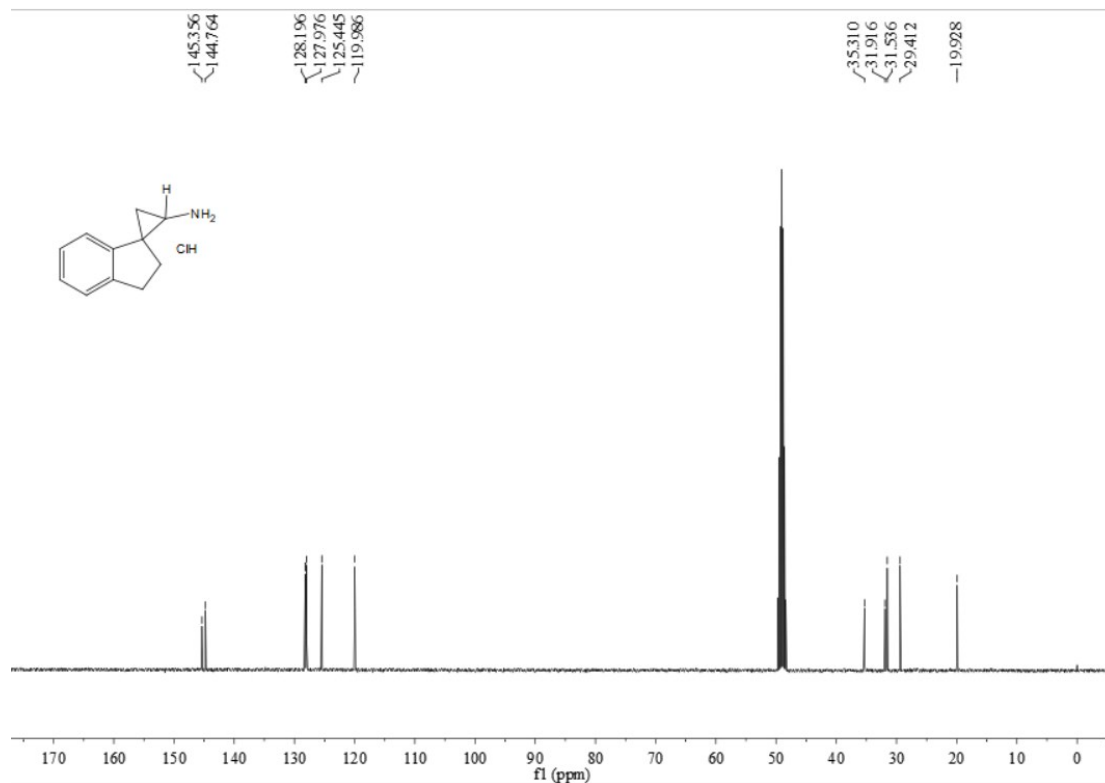

**<sup>1</sup>H-<sup>1</sup>H COESY (CD<sub>3</sub>OD) spectrum for 8a**

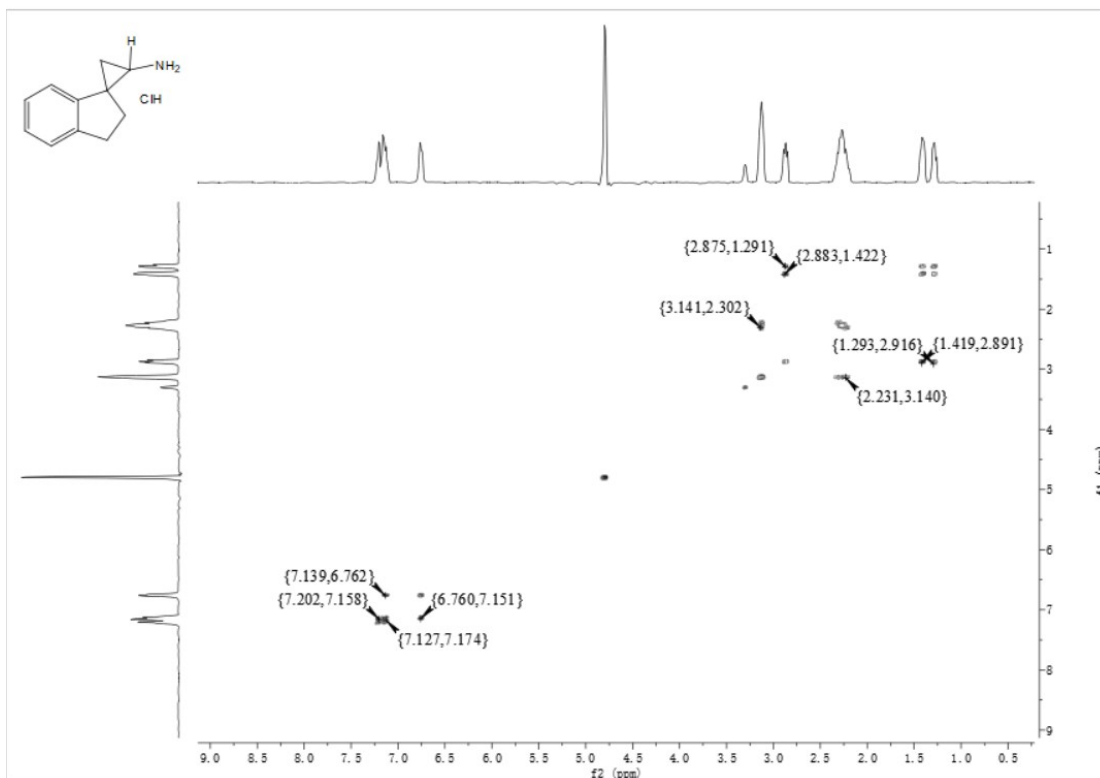

$^1\text{H}$ - $^1\text{H}$  NOESY ( $\text{CD}_3\text{OD}$ ) spectrum for 8a

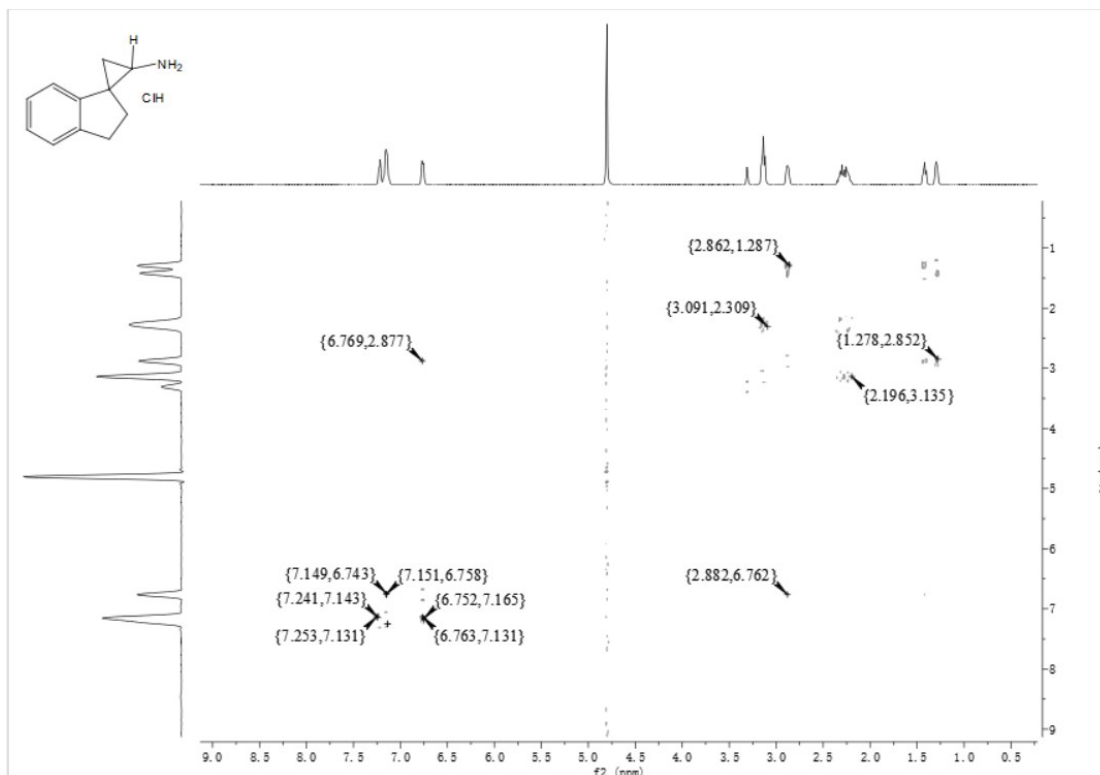

$^1\text{H}$  NMR (400 MHz,  $\text{CD}_3\text{OD}$ ) and  $^{13}\text{C}$  NMR (101MHz,  $\text{CD}_3\text{OD}$ ) spectrum for 8b

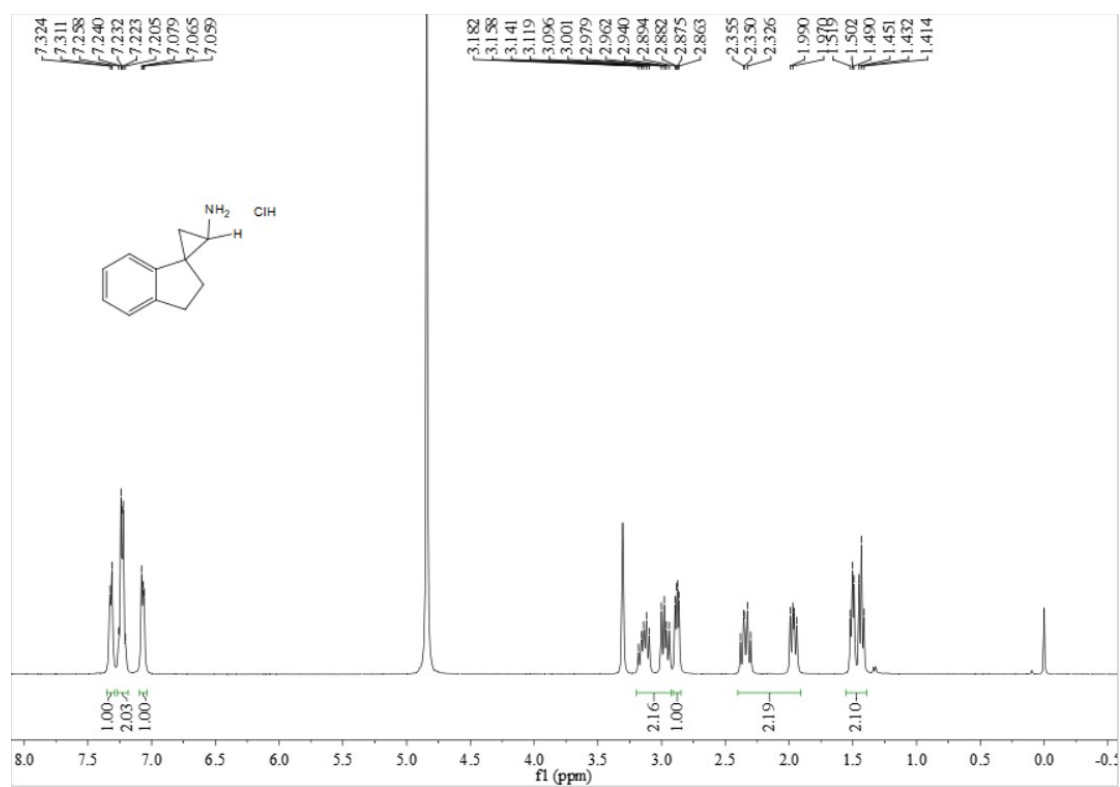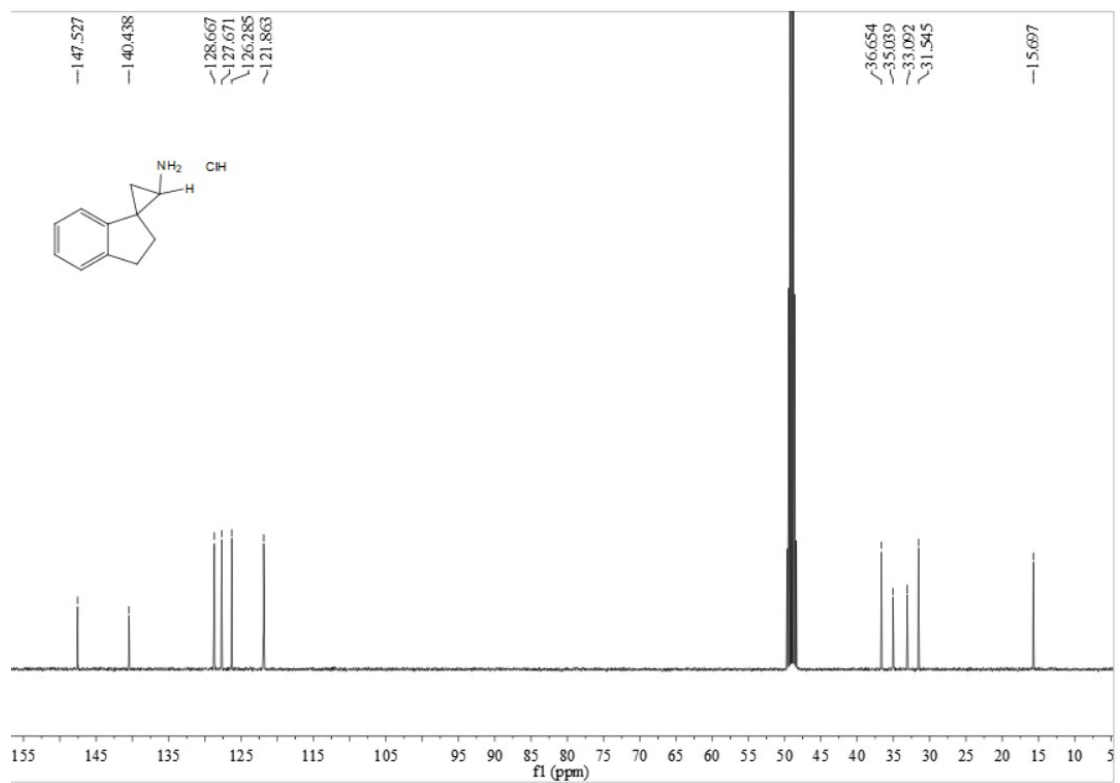

**<sup>1</sup>H-<sup>1</sup>H COESY (CD<sub>3</sub>OD) spectrum for 8b**

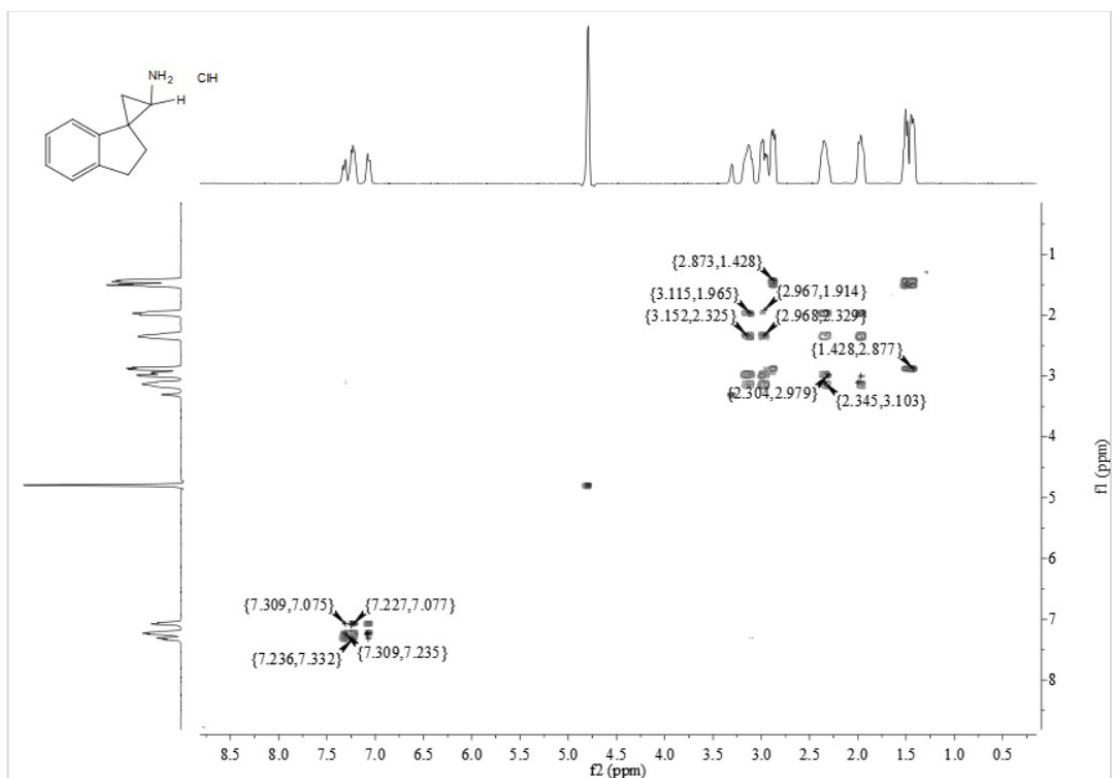

**<sup>1</sup>H-<sup>1</sup>H NOESY (CD<sub>3</sub>OD) spectrum for 8b**

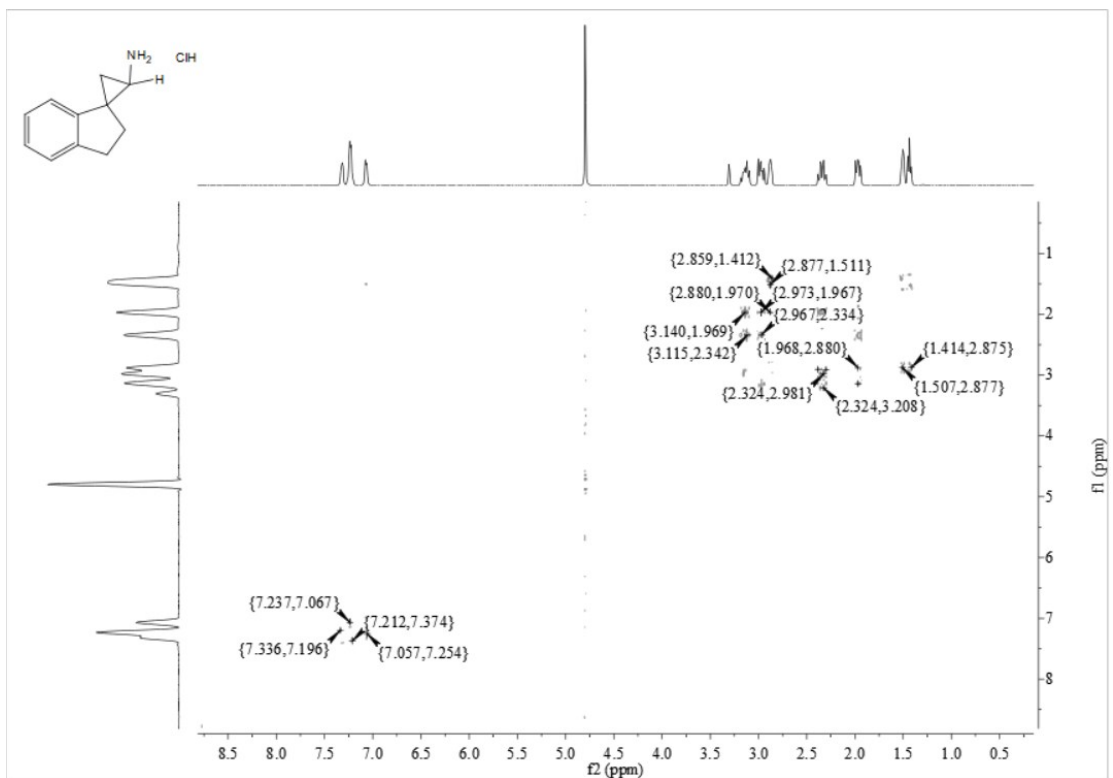

**<sup>1</sup>H NMR (400 MHz, CDCl<sub>3</sub>) and <sup>13</sup>C NMR (101MHz, CDCl<sub>3</sub>) spectrum for 13a**

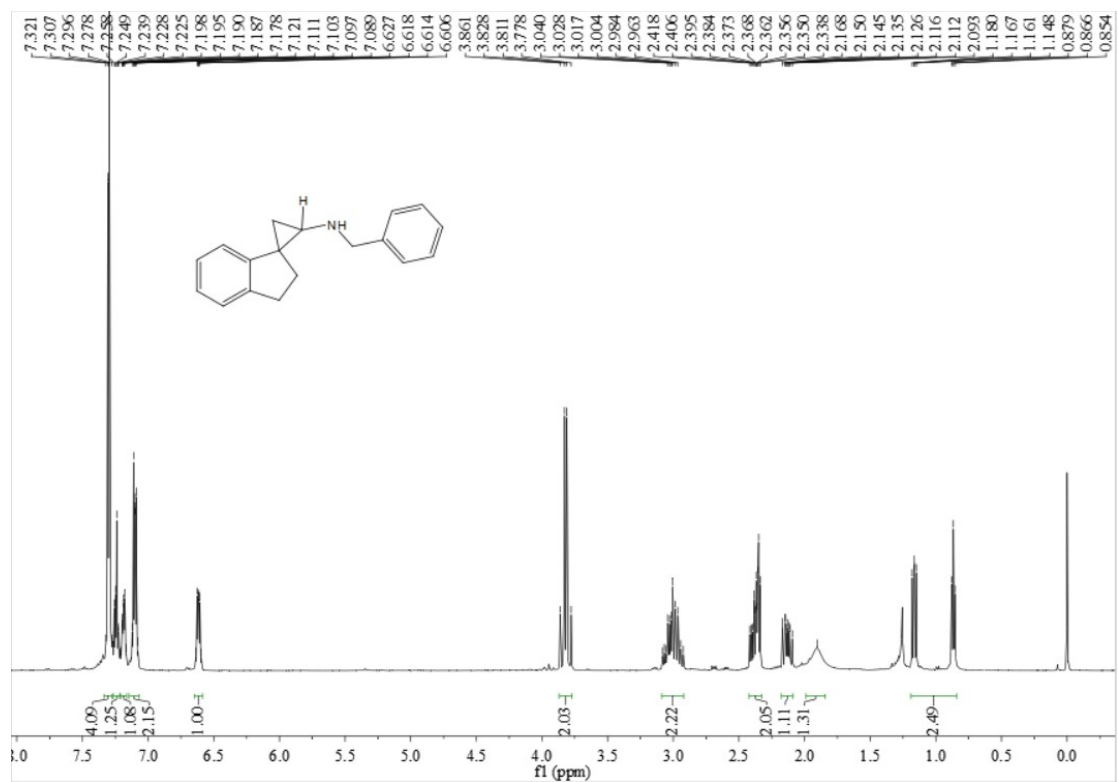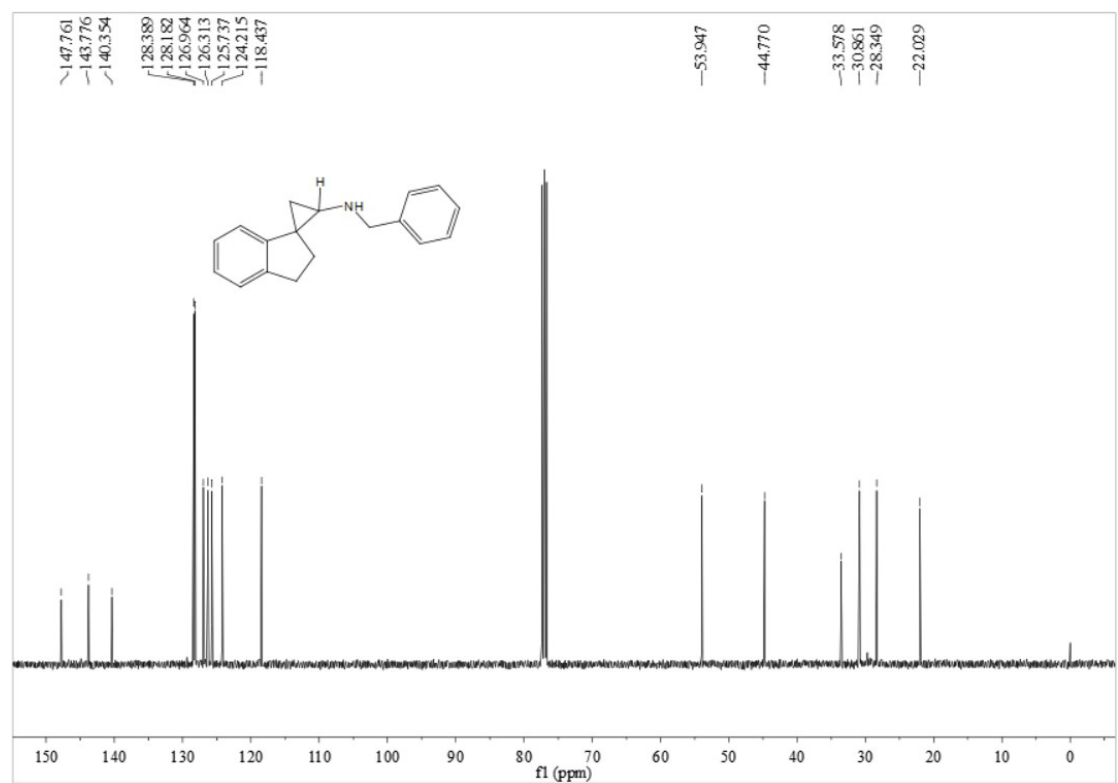

**<sup>1</sup>H NMR (400 MHz, CDCl<sub>3</sub>) and <sup>13</sup>C NMR (101MHz, CDCl<sub>3</sub>) spectrum for 13b**

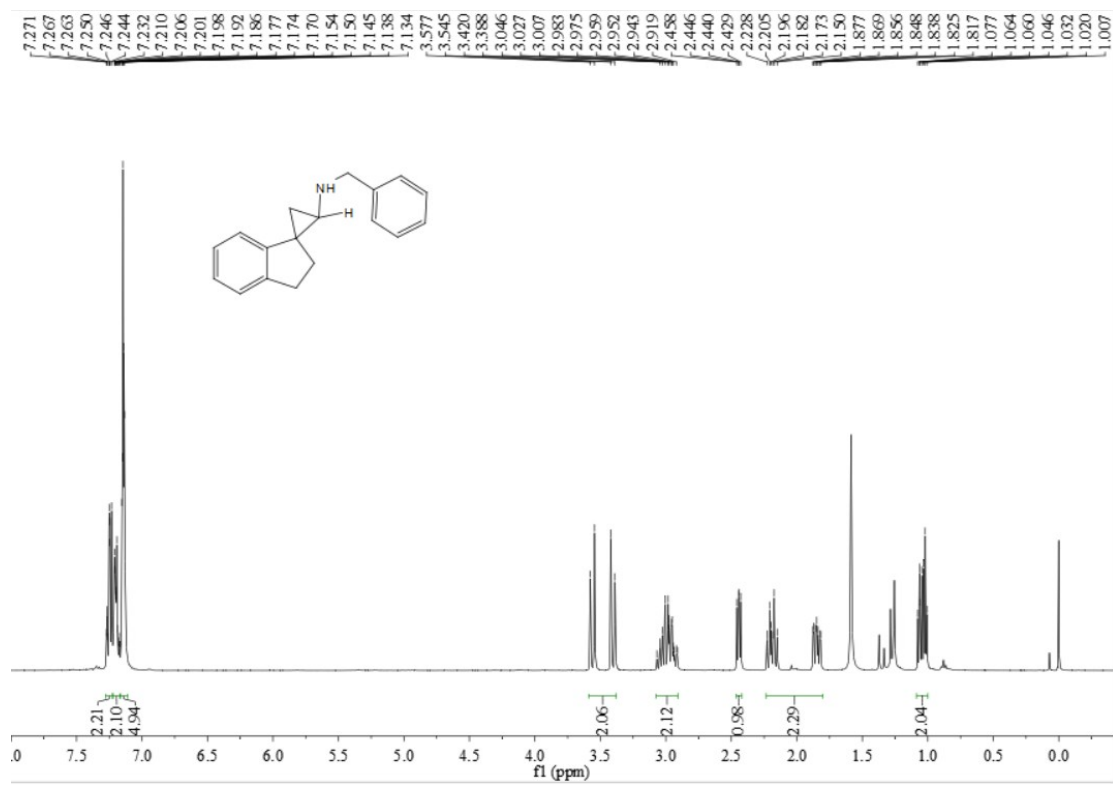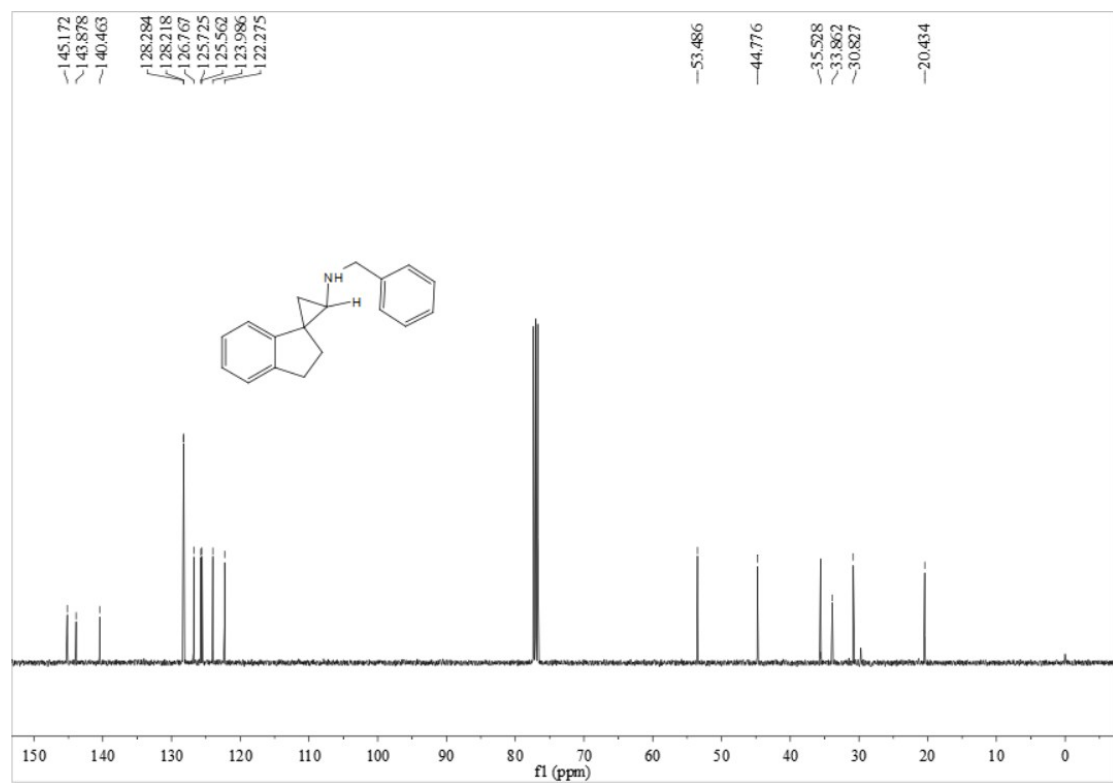

**<sup>1</sup>H NMR (400 MHz, CDCl<sub>3</sub>) and <sup>13</sup>C NMR (101 MHz, CDCl<sub>3</sub>) spectrum for 14a**



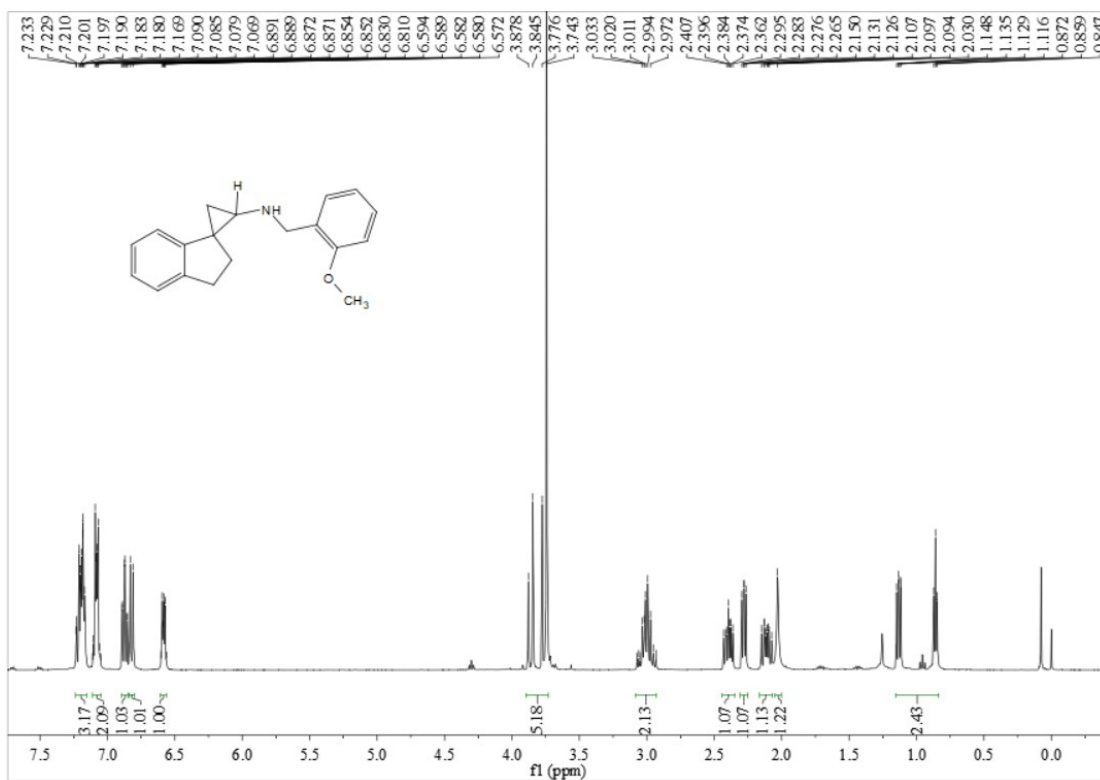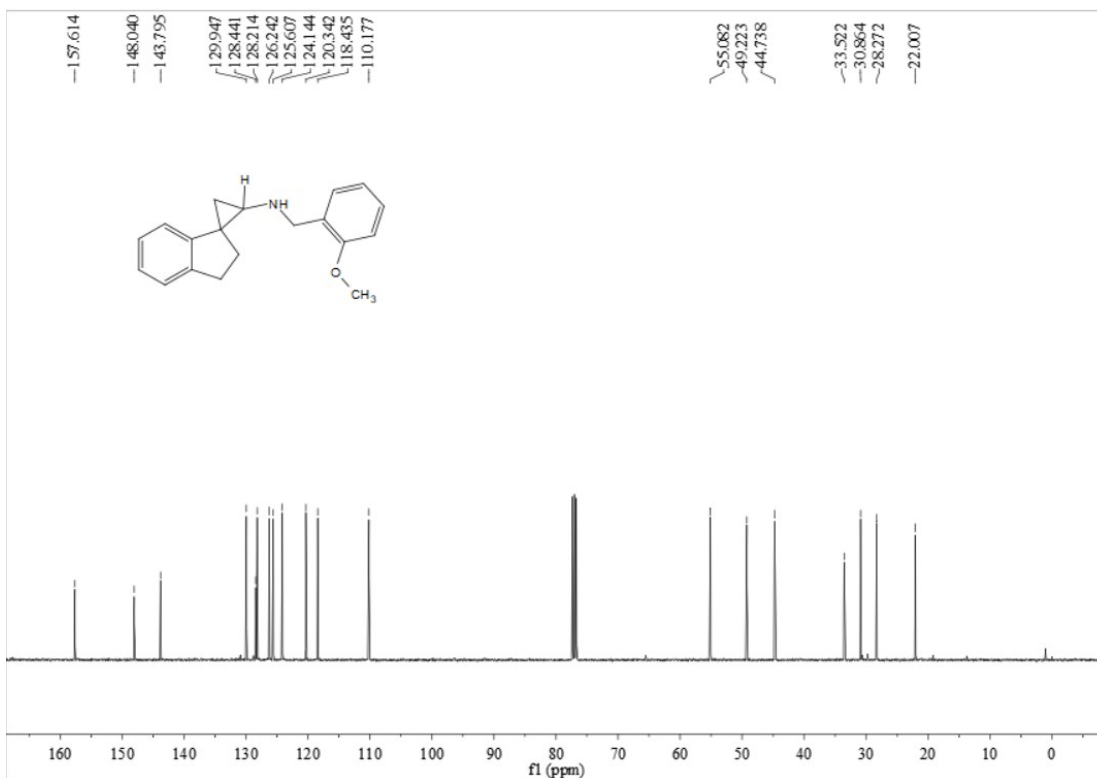

<sup>1</sup>H NMR (400 MHz, CDCl<sub>3</sub>) and <sup>13</sup>C NMR (101 MHz, CDCl<sub>3</sub>) spectrum for 14b

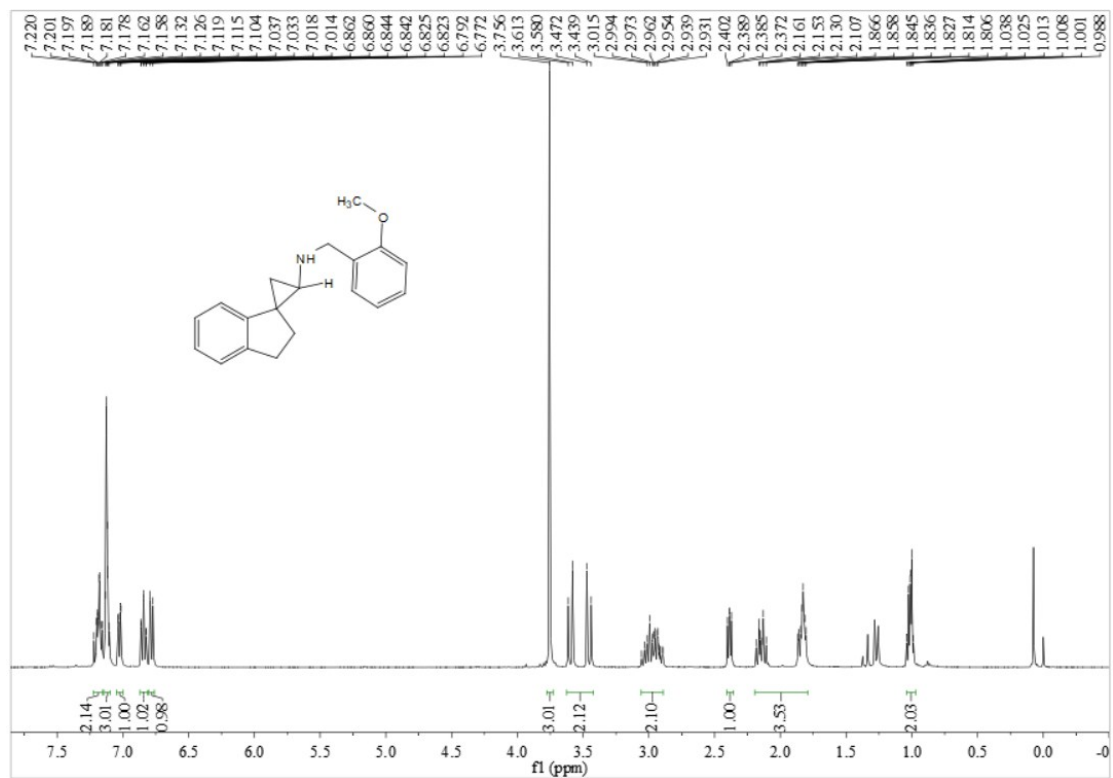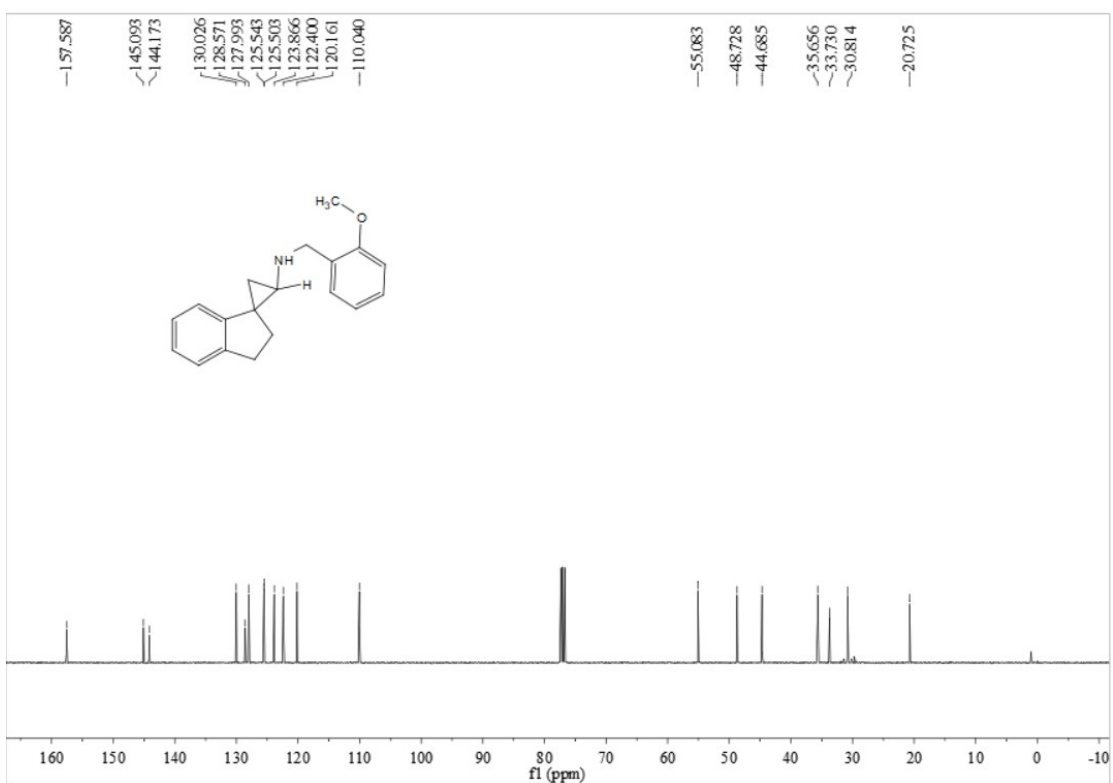

<sup>1</sup>H NMR (400 MHz, CDCl<sub>3</sub>) and <sup>13</sup>C NMR (101MHz, CDCl<sub>3</sub>) spectrum for 15a

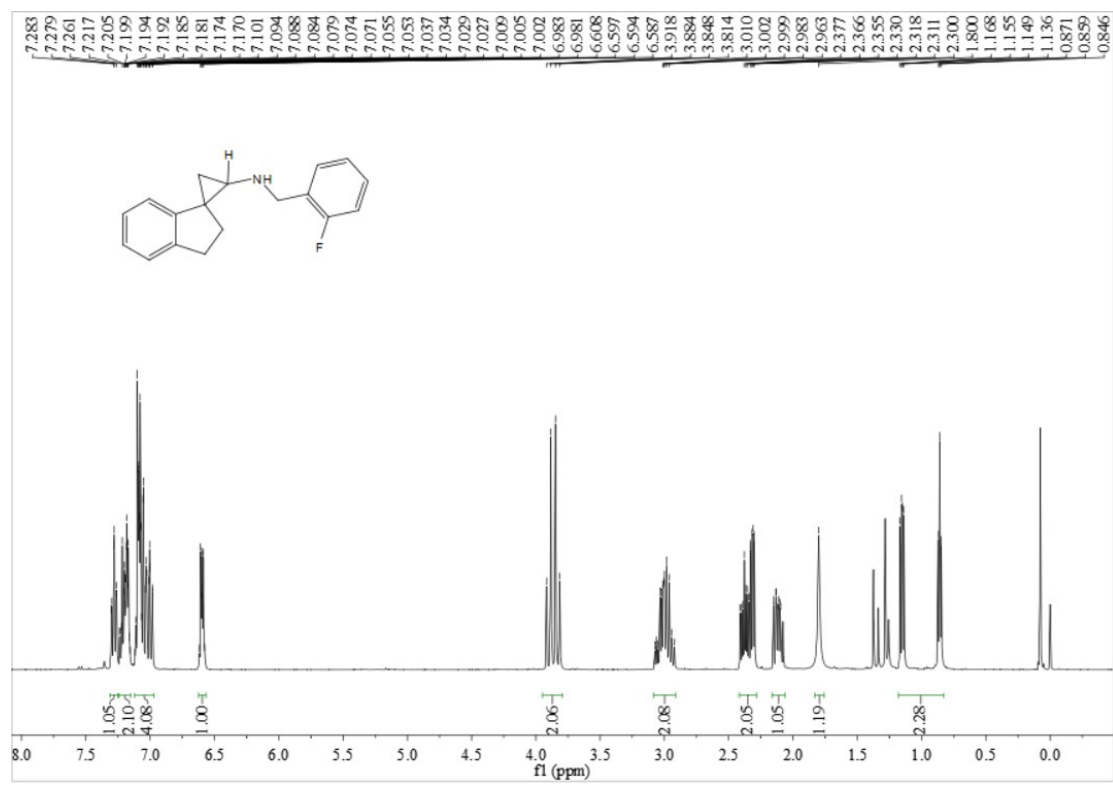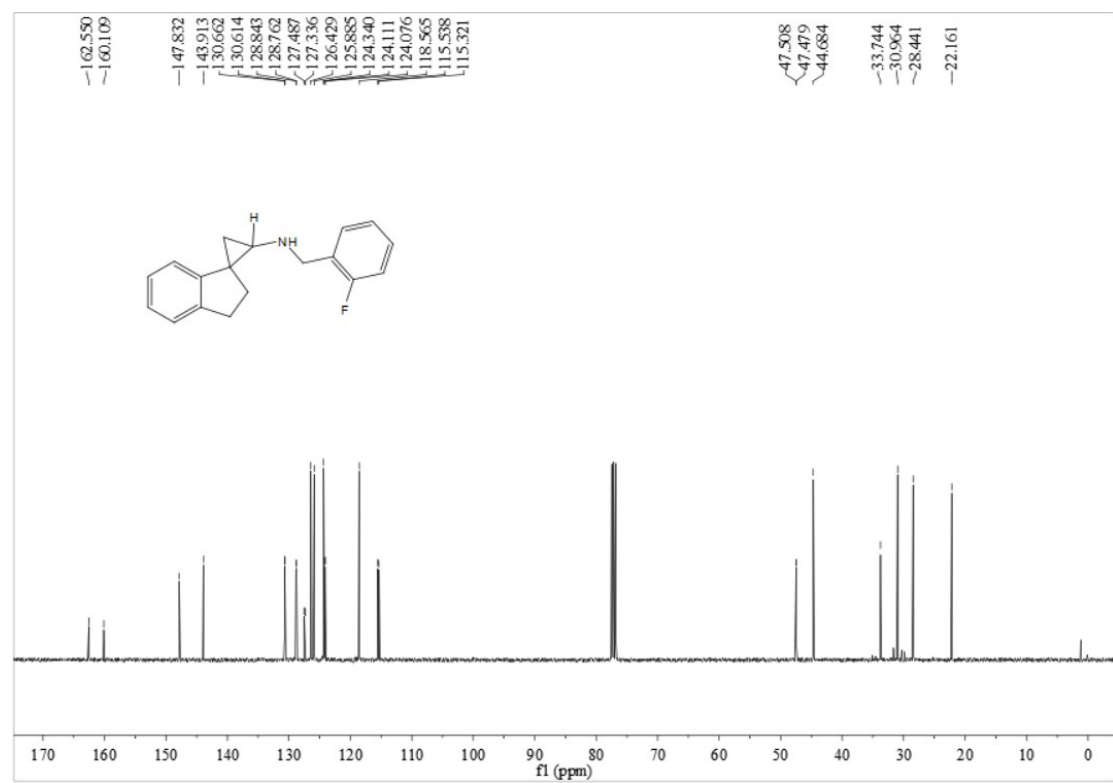

**<sup>1</sup>H NMR (400 MHz, CDCl<sub>3</sub>) and <sup>13</sup>C NMR (101MHz, CDCl<sub>3</sub>) spectrum for 15b**

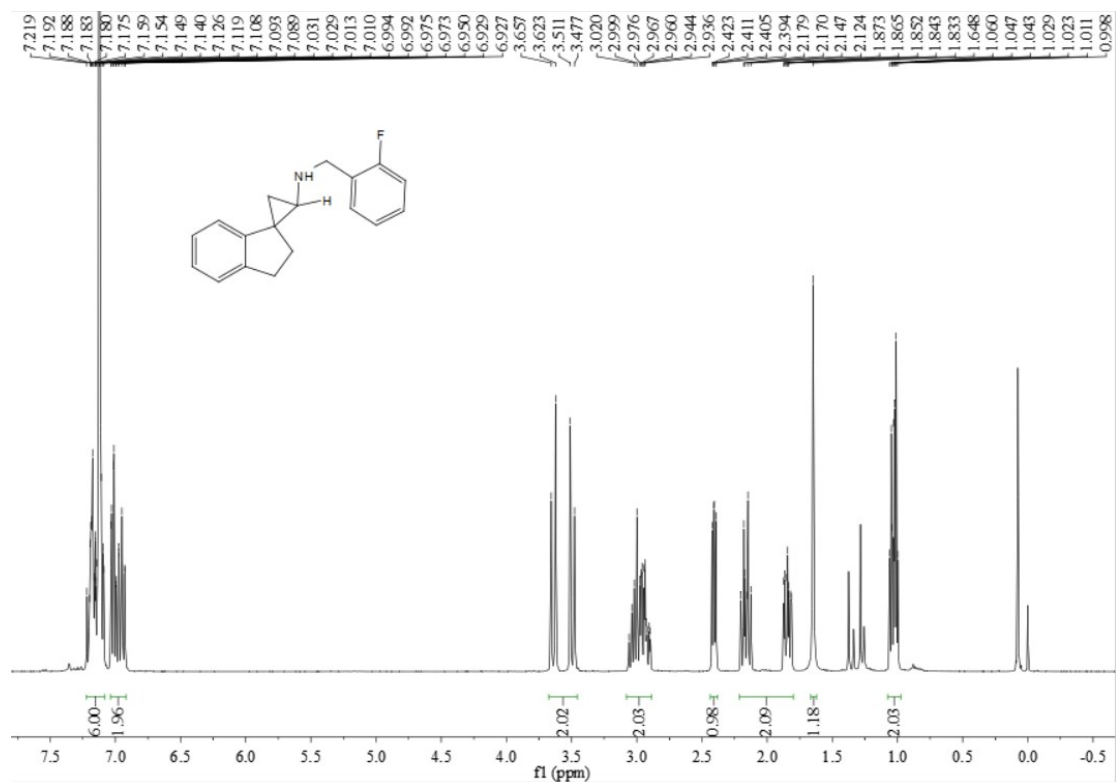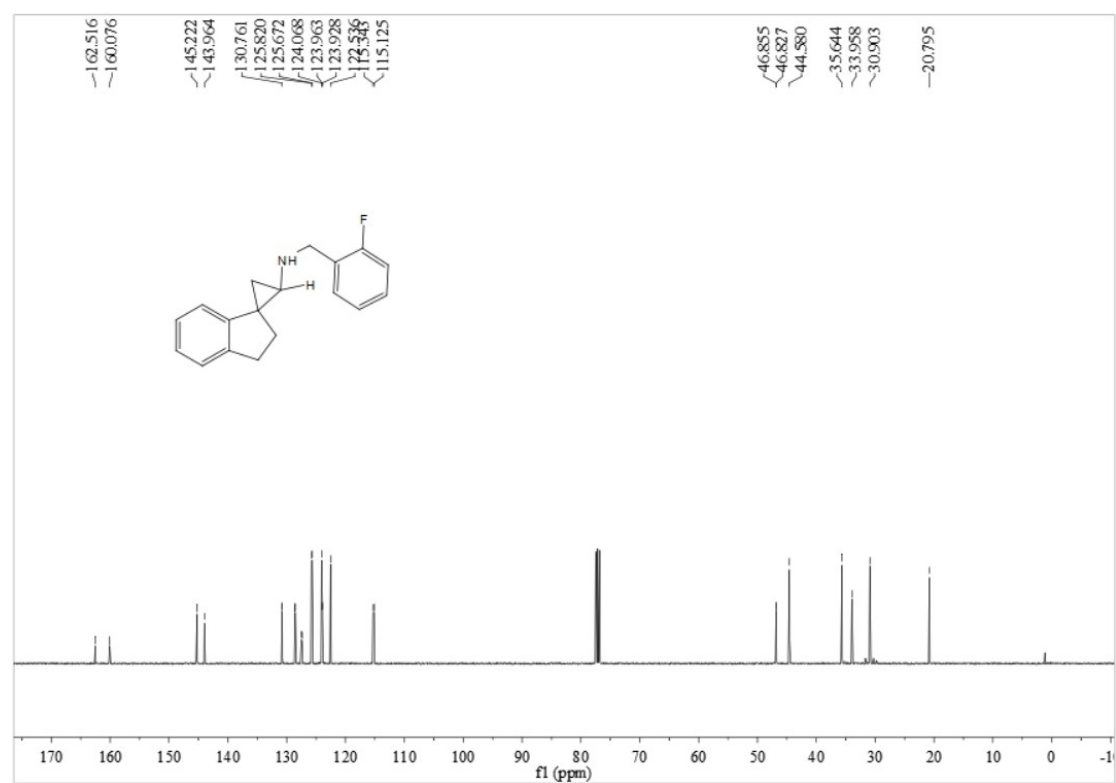

**<sup>1</sup>H NMR (400 MHz, CDCl<sub>3</sub>) and <sup>13</sup>C NMR (101 MHz, CDCl<sub>3</sub>) spectrum for 16a**

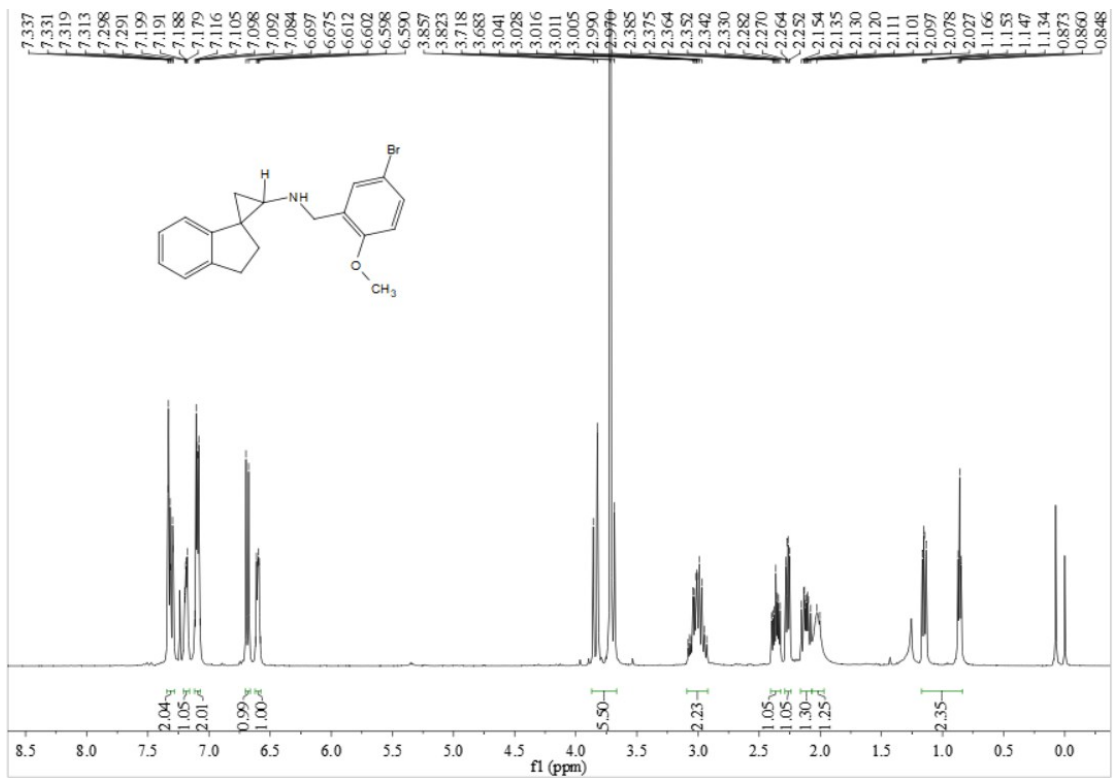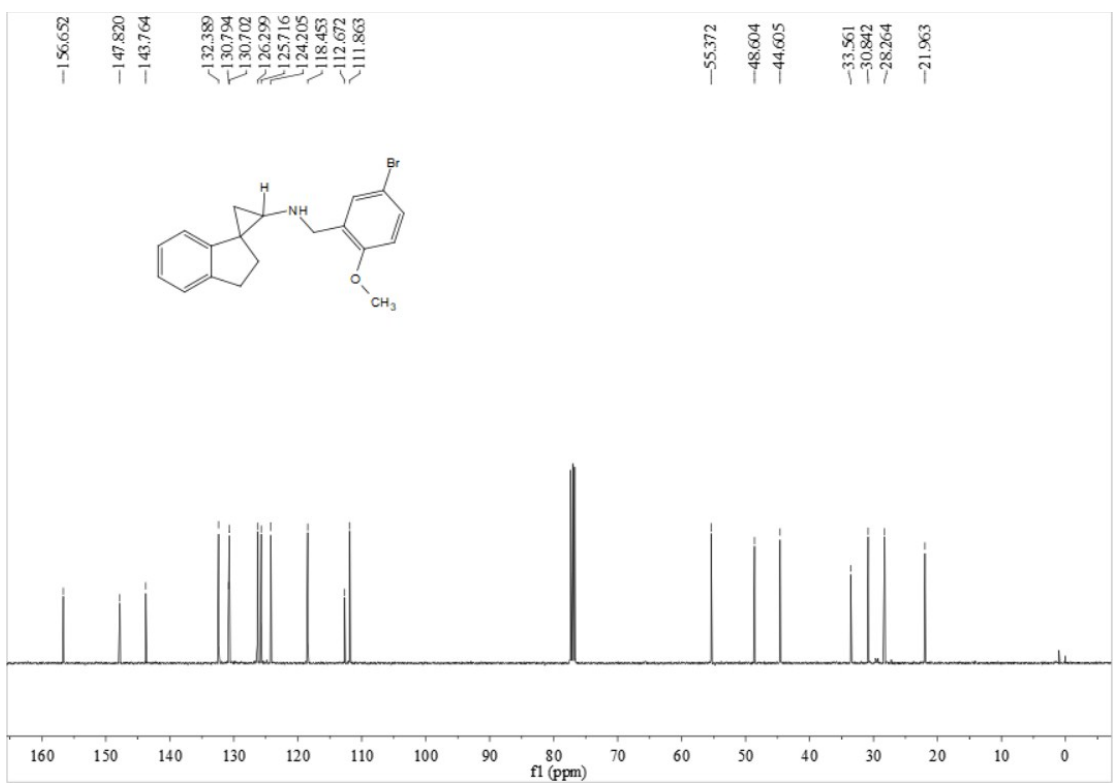

<sup>1</sup>H NMR (400 MHz, CDCl<sub>3</sub>) and <sup>13</sup>C NMR (101 MHz, CDCl<sub>3</sub>) spectrum for 16b

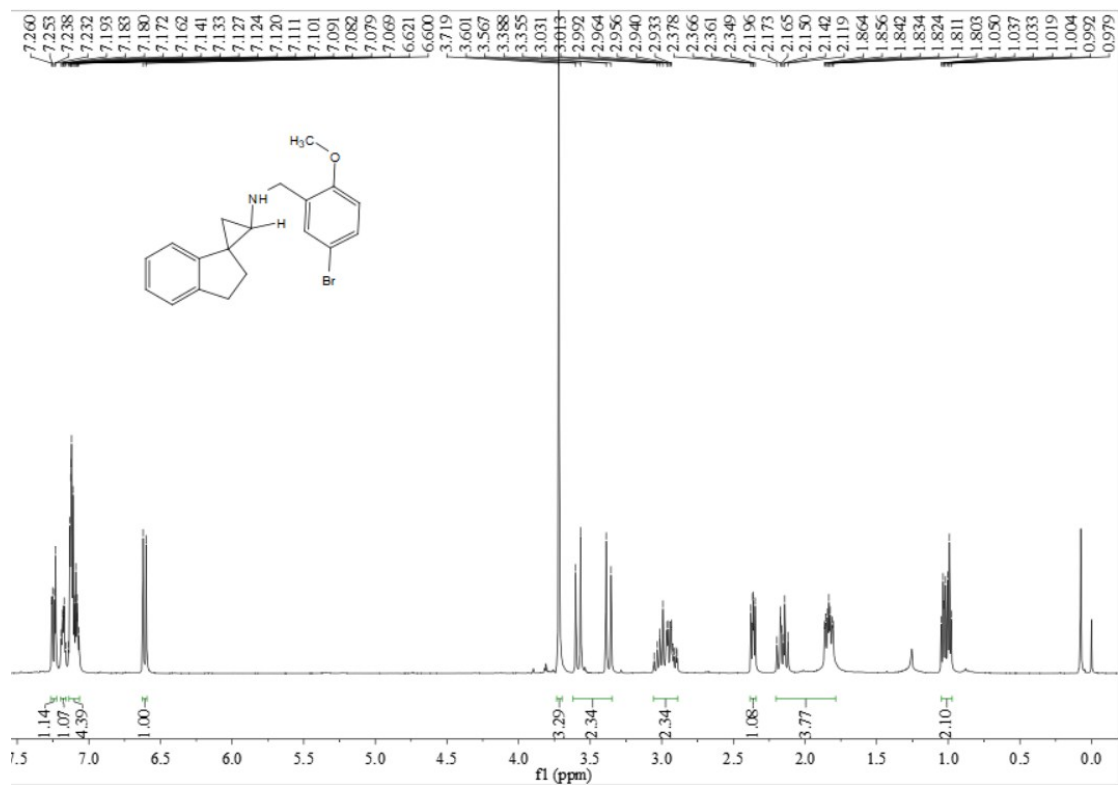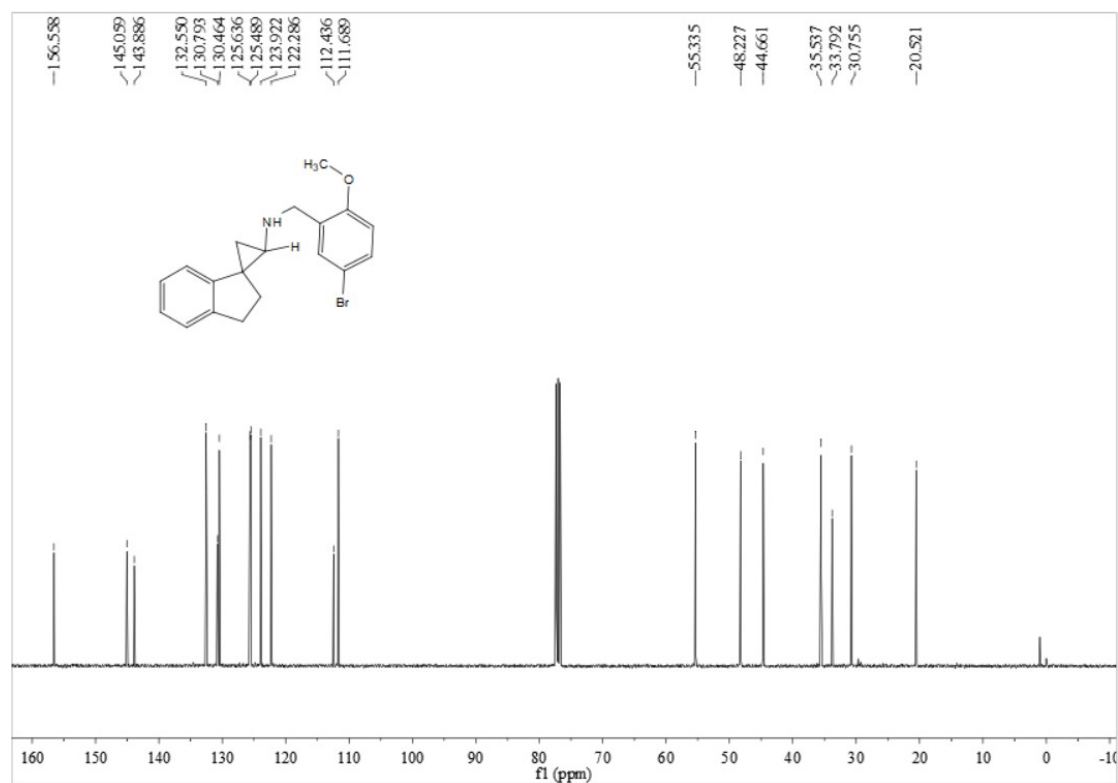

**<sup>1</sup>H NMR (400 MHz, CDCl<sub>3</sub>) and <sup>13</sup>C NMR (101MHz, CDCl<sub>3</sub>) spectrum for 17a**

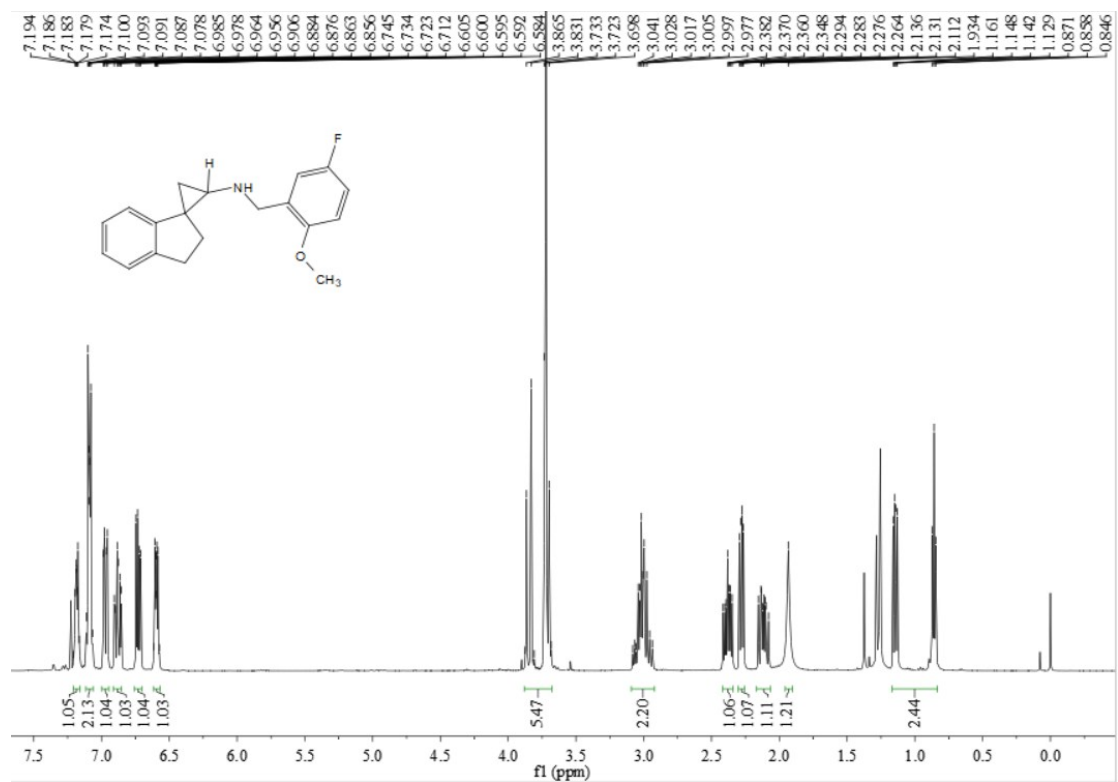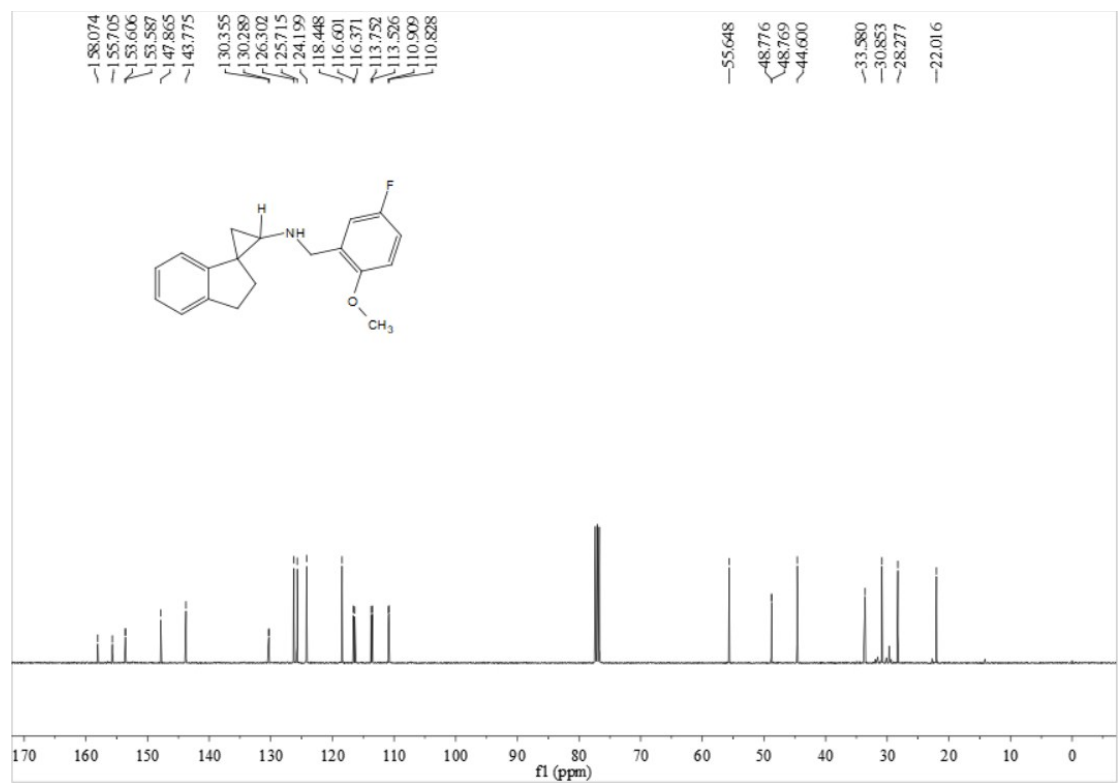

**<sup>1</sup>H NMR (400 MHz, CDCl<sub>3</sub>) and <sup>13</sup>C NMR (101MHz, CDCl<sub>3</sub>) spectrum for 17b**

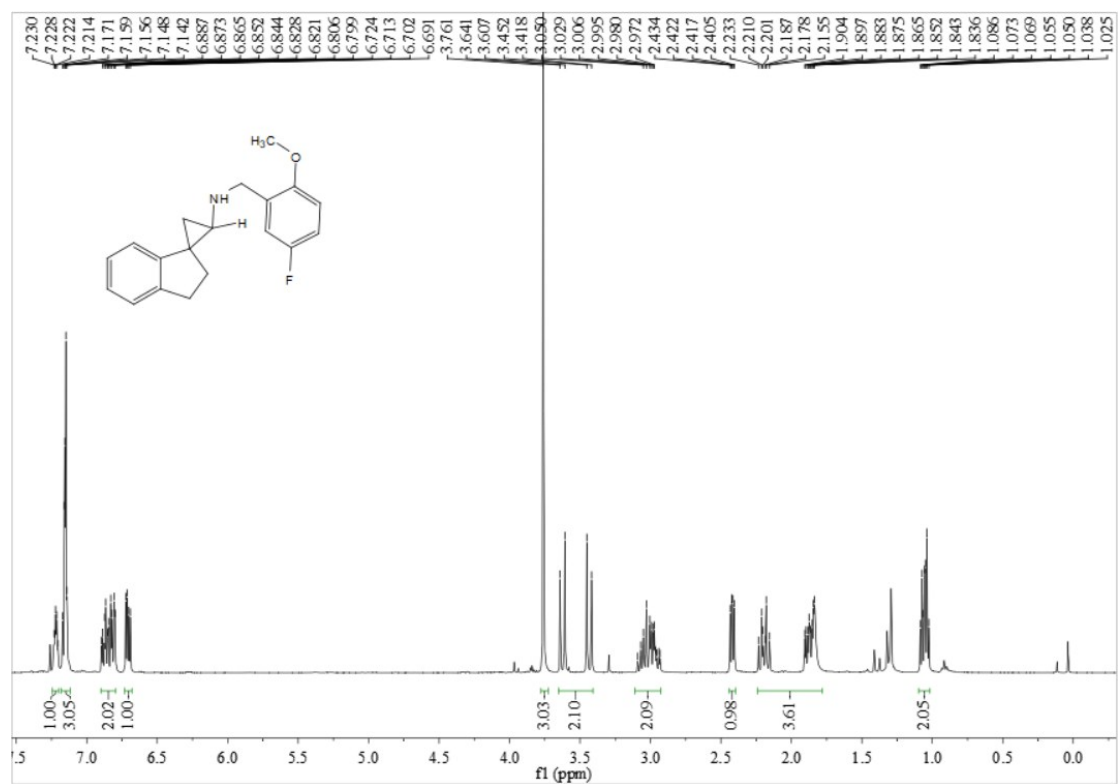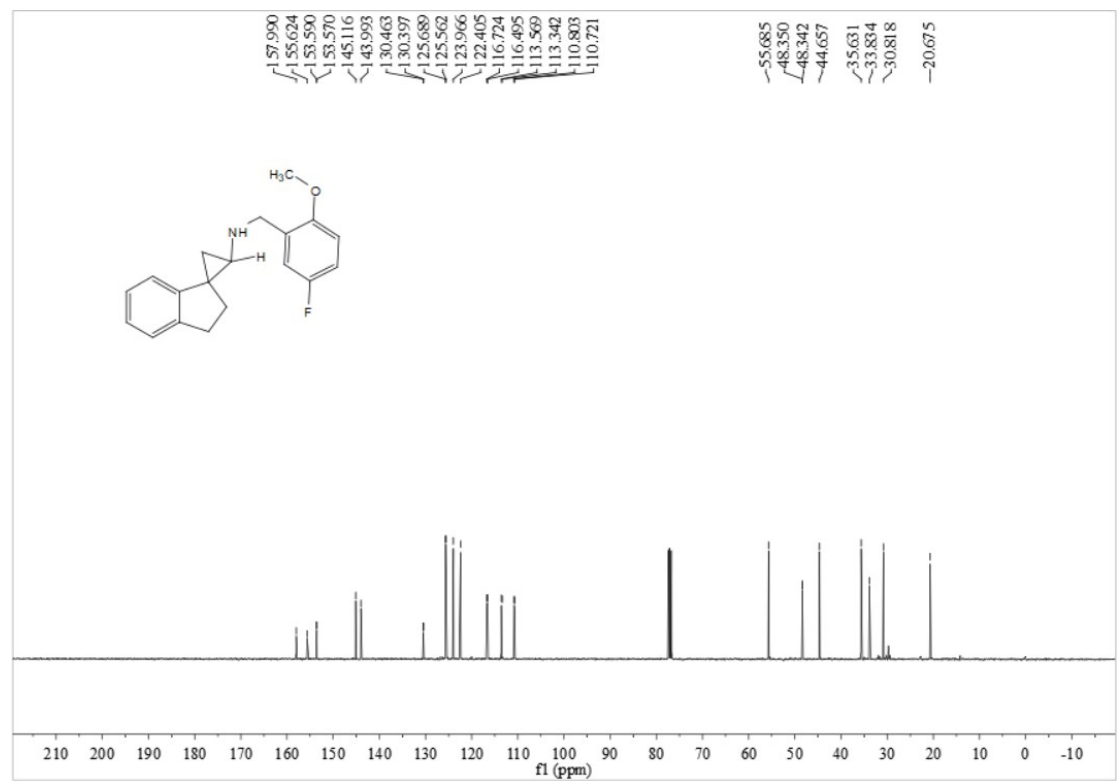

**<sup>1</sup>H NMR (400 MHz, CDCl<sub>3</sub>) and <sup>13</sup>C NMR (101 MHz, CDCl<sub>3</sub>) spectrum for 18a**



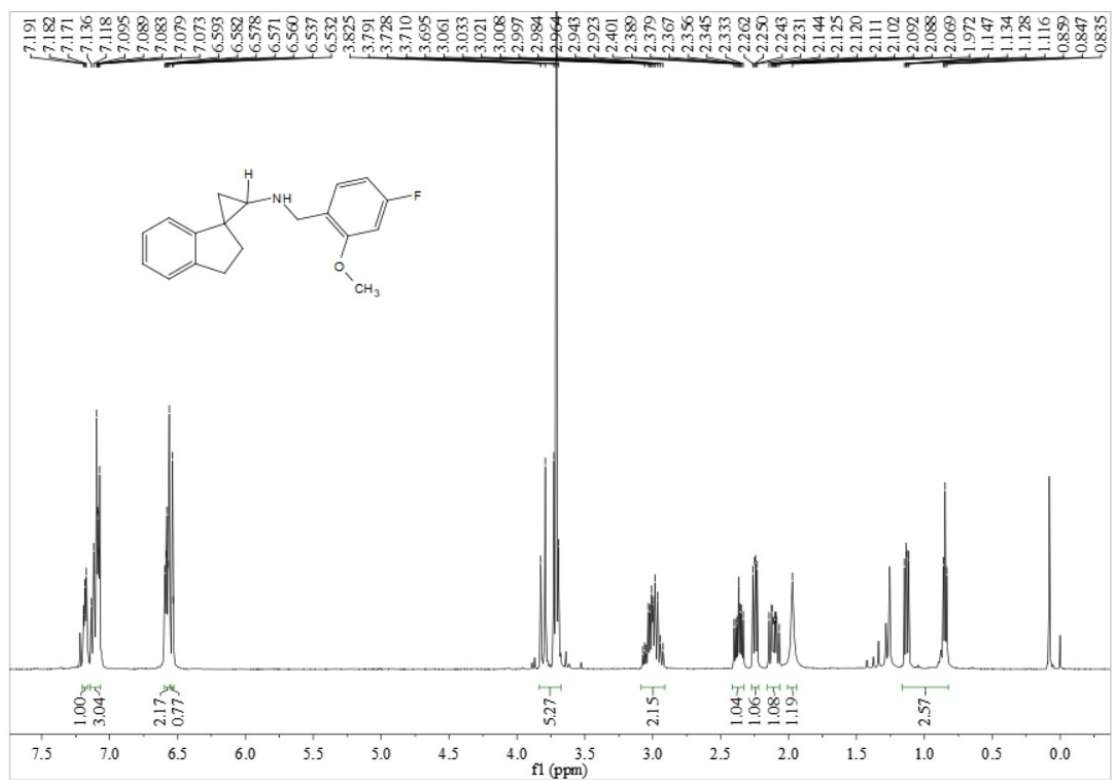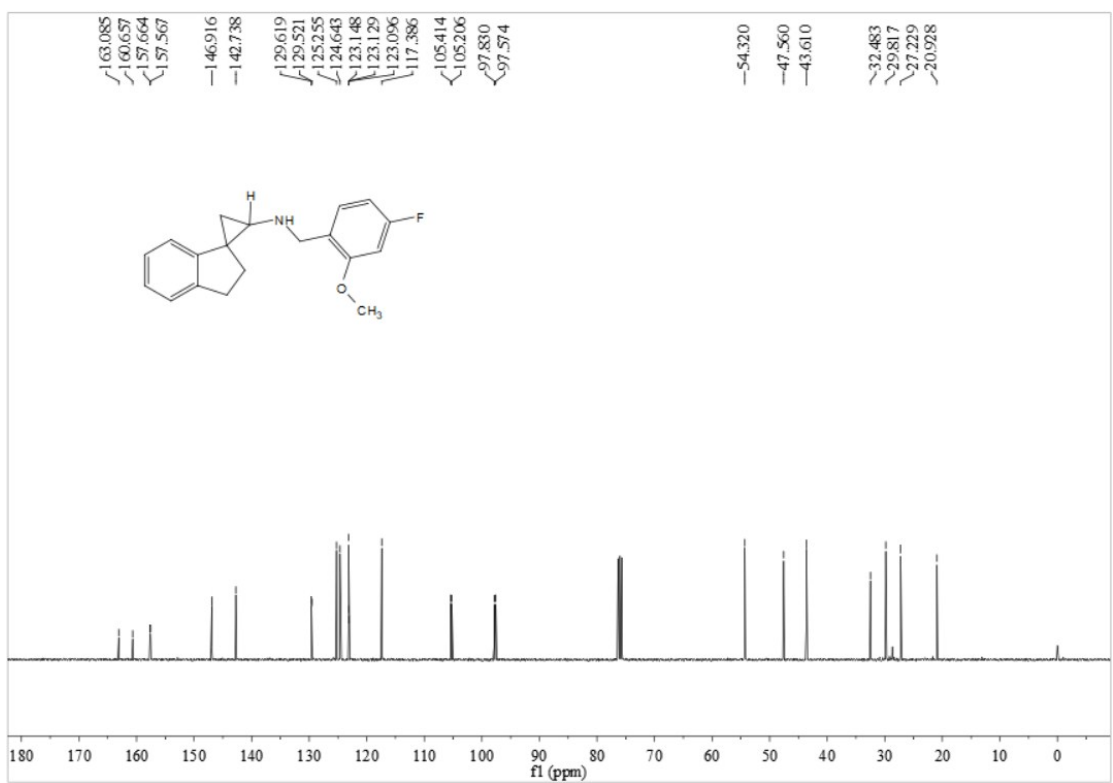

**<sup>1</sup>H NMR (400 MHz, CDCl<sub>3</sub>) and <sup>13</sup>C NMR (101MHz, CDCl<sub>3</sub>) spectrum for 18b**

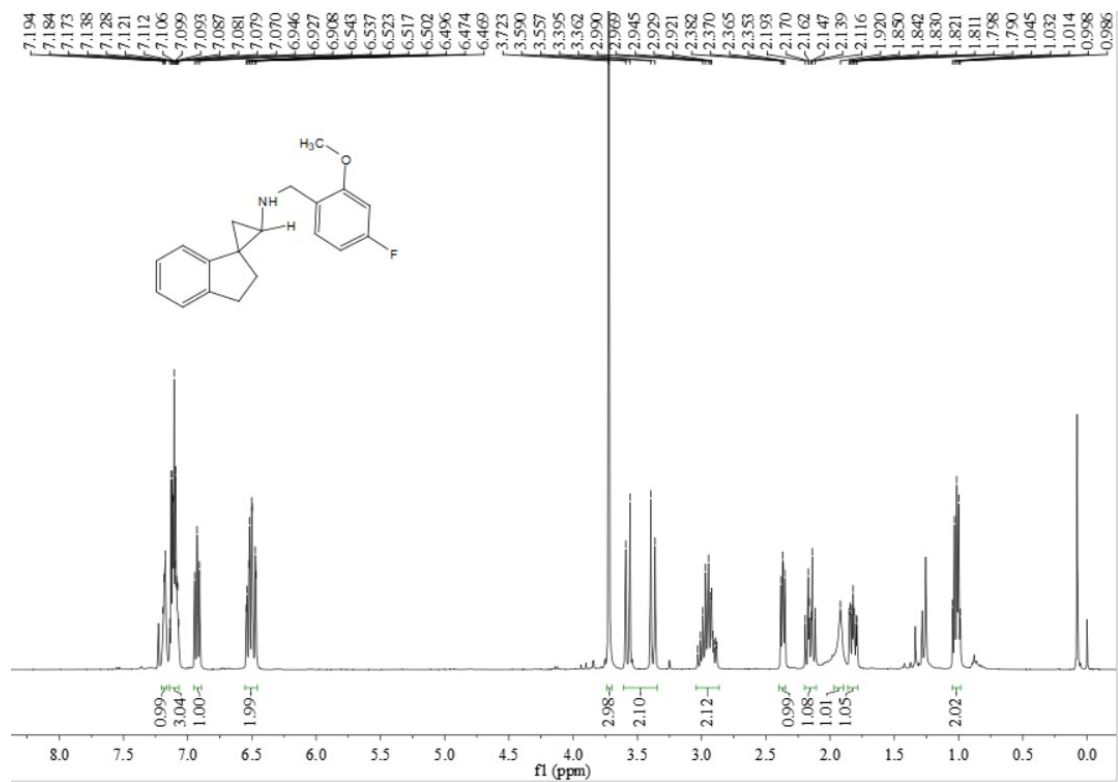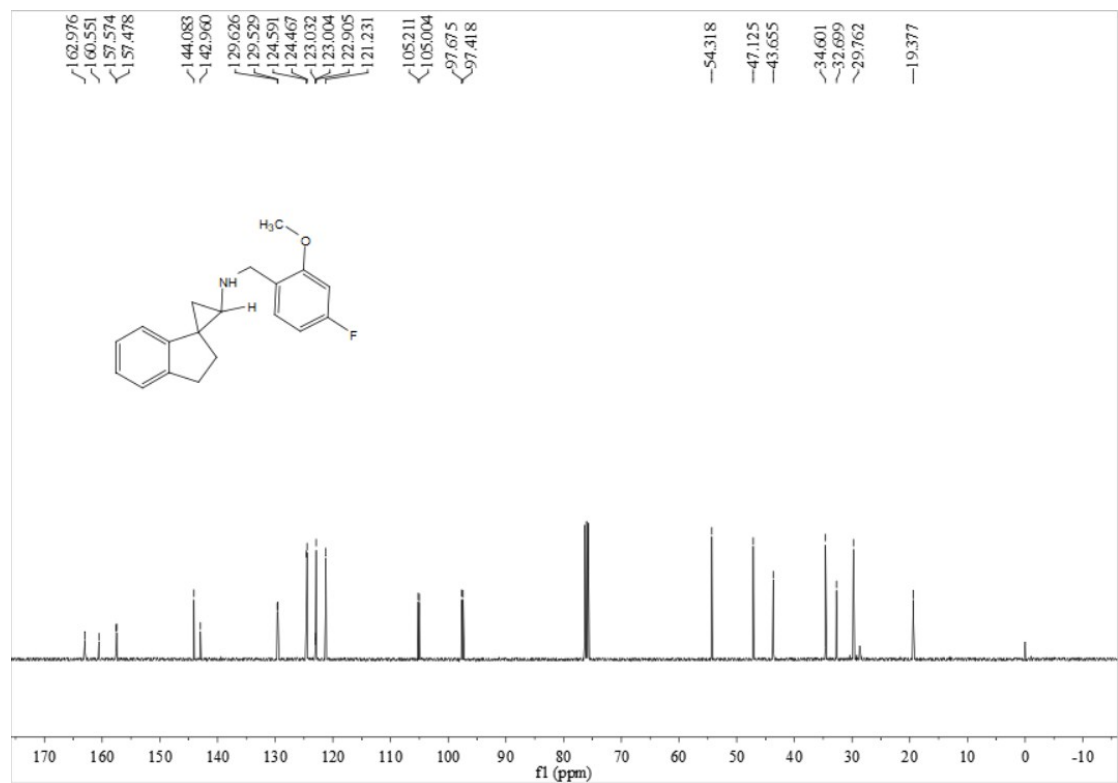

**<sup>1</sup>H NMR (400 MHz, CDCl<sub>3</sub>) and <sup>13</sup>C NMR (101 MHz, CDCl<sub>3</sub>) spectrum for 19a**

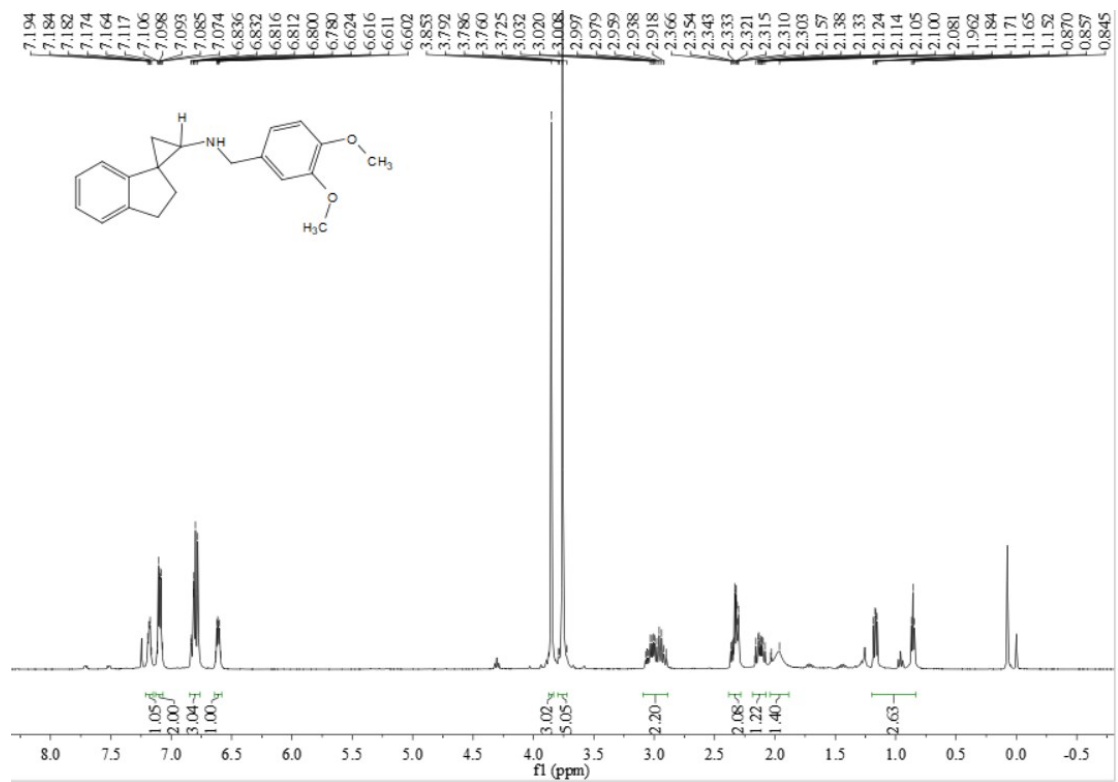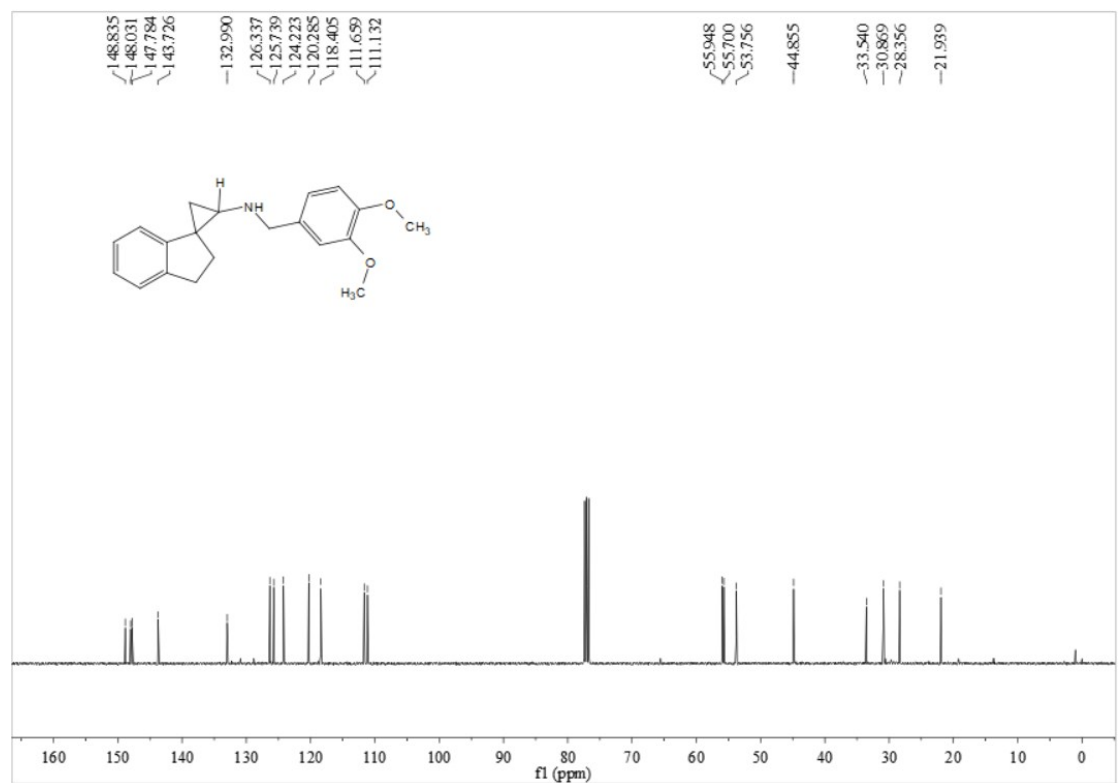

<sup>1</sup>H NMR (400 MHz, CDCl<sub>3</sub>) and <sup>13</sup>C NMR (101 MHz, CDCl<sub>3</sub>) spectrum for 19b

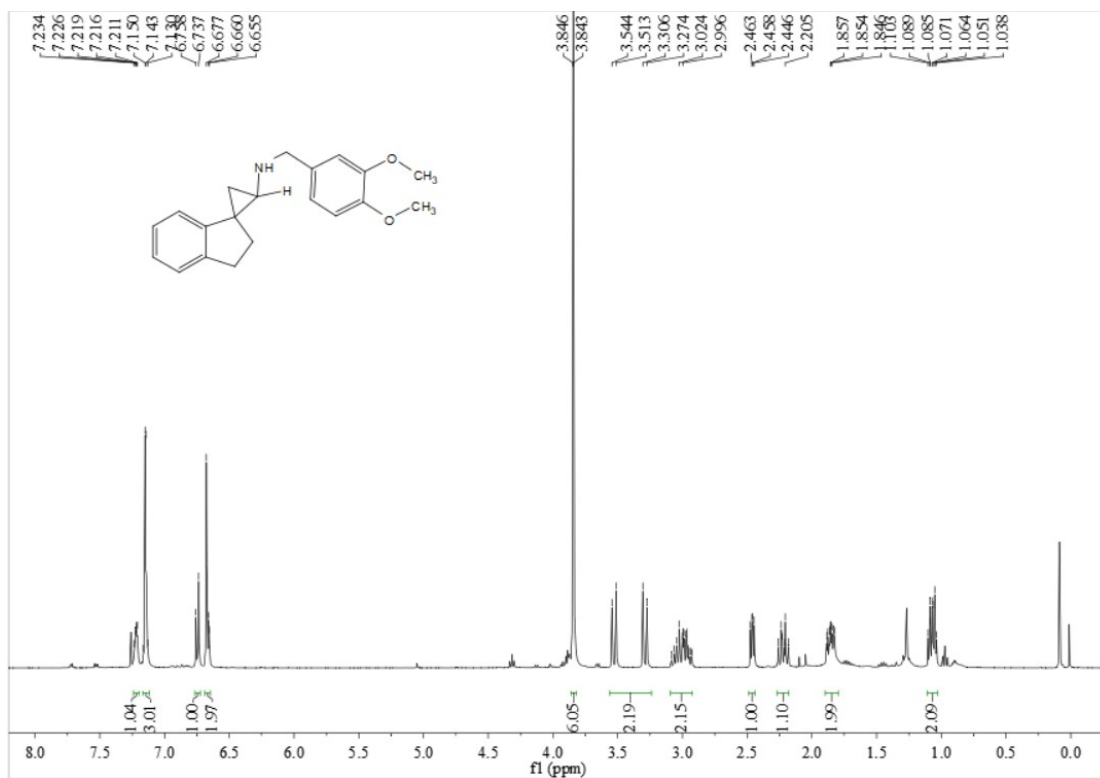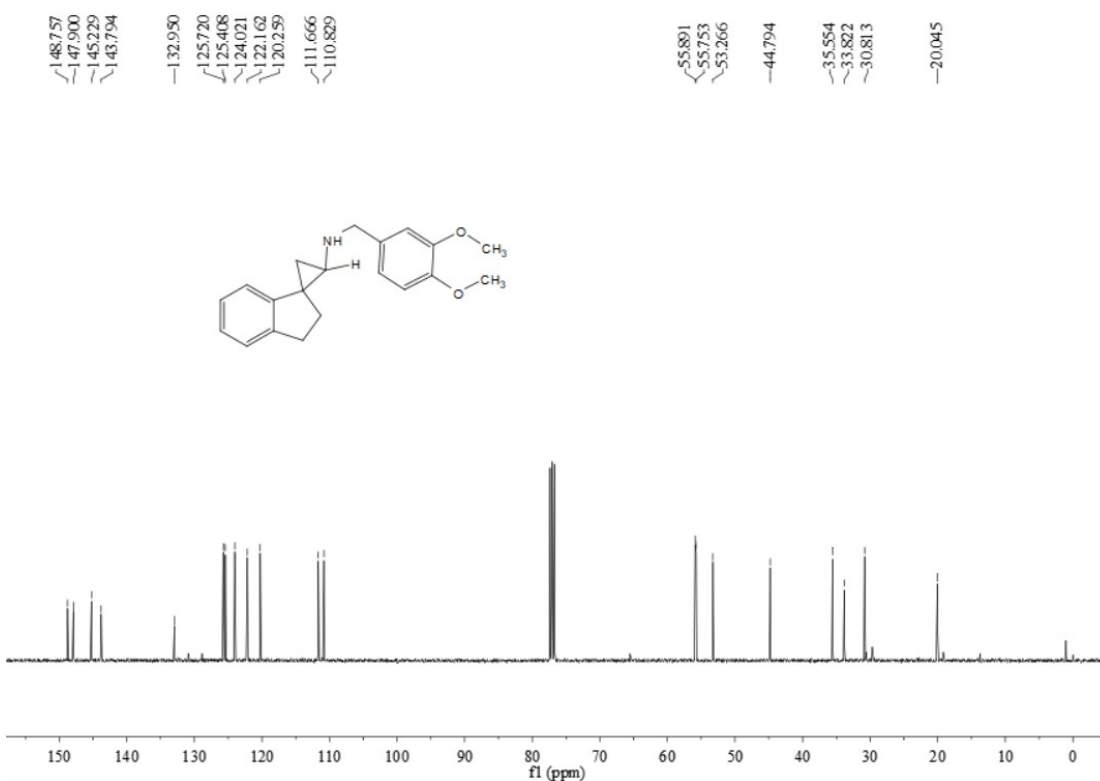

<sup>1</sup>H NMR (400 MHz, CDCl<sub>3</sub>) and <sup>13</sup>C NMR (101 MHz, CDCl<sub>3</sub>) spectrum for 20a

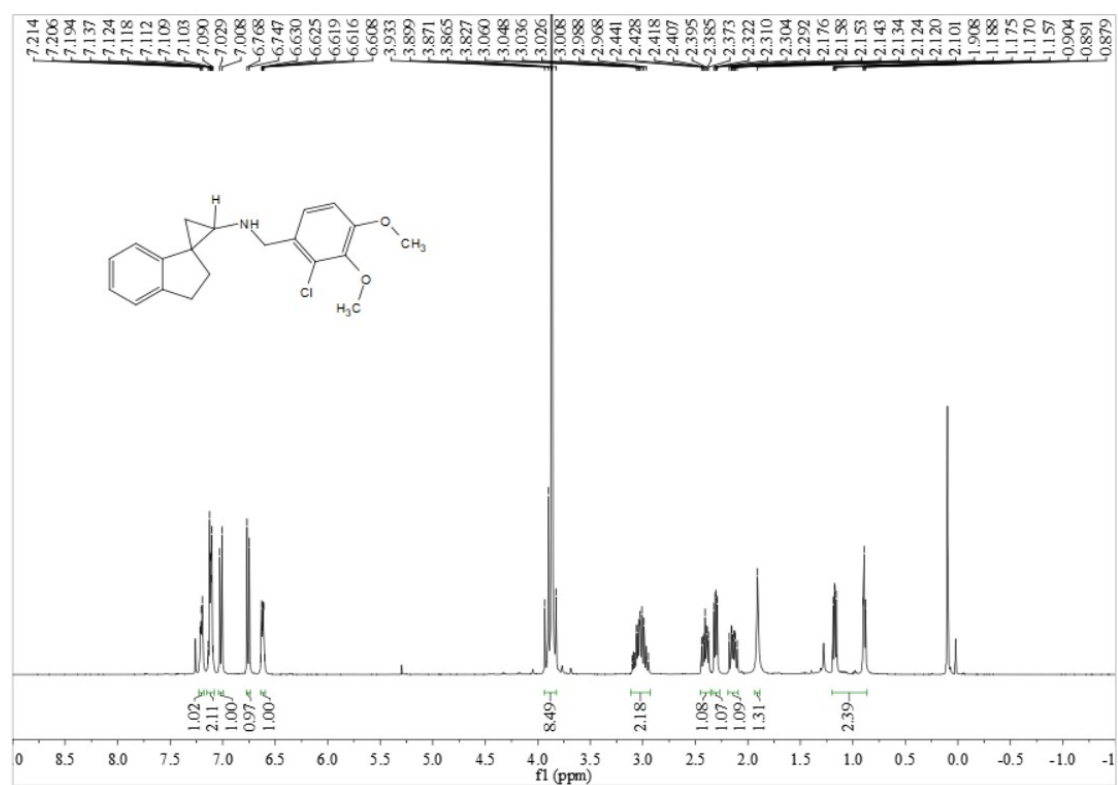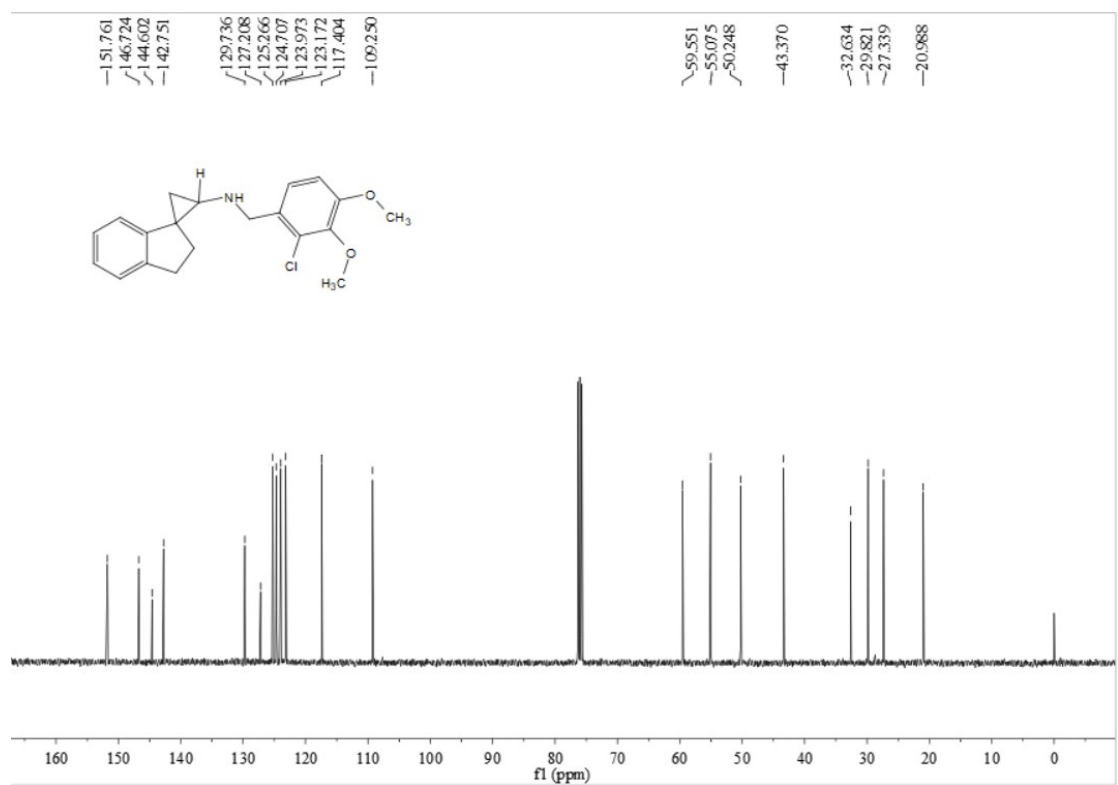

<sup>1</sup>H NMR (400 MHz, CDCl<sub>3</sub>) and <sup>13</sup>C NMR (101 MHz, CDCl<sub>3</sub>) spectrum for 20b

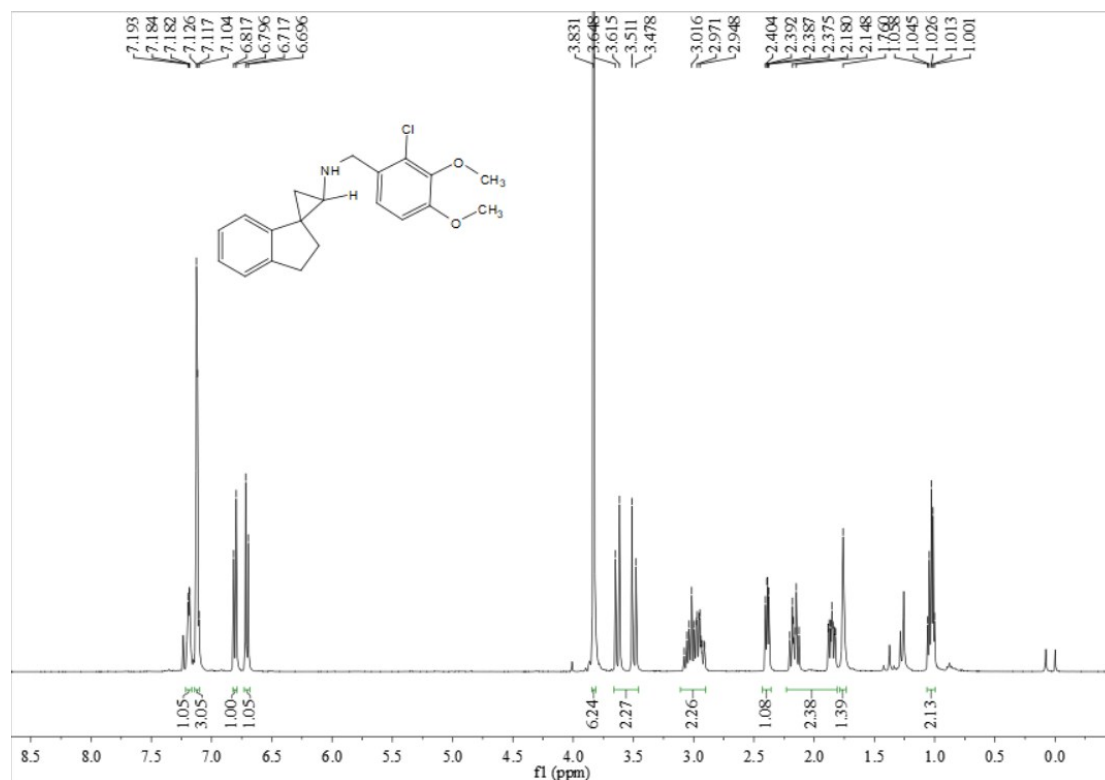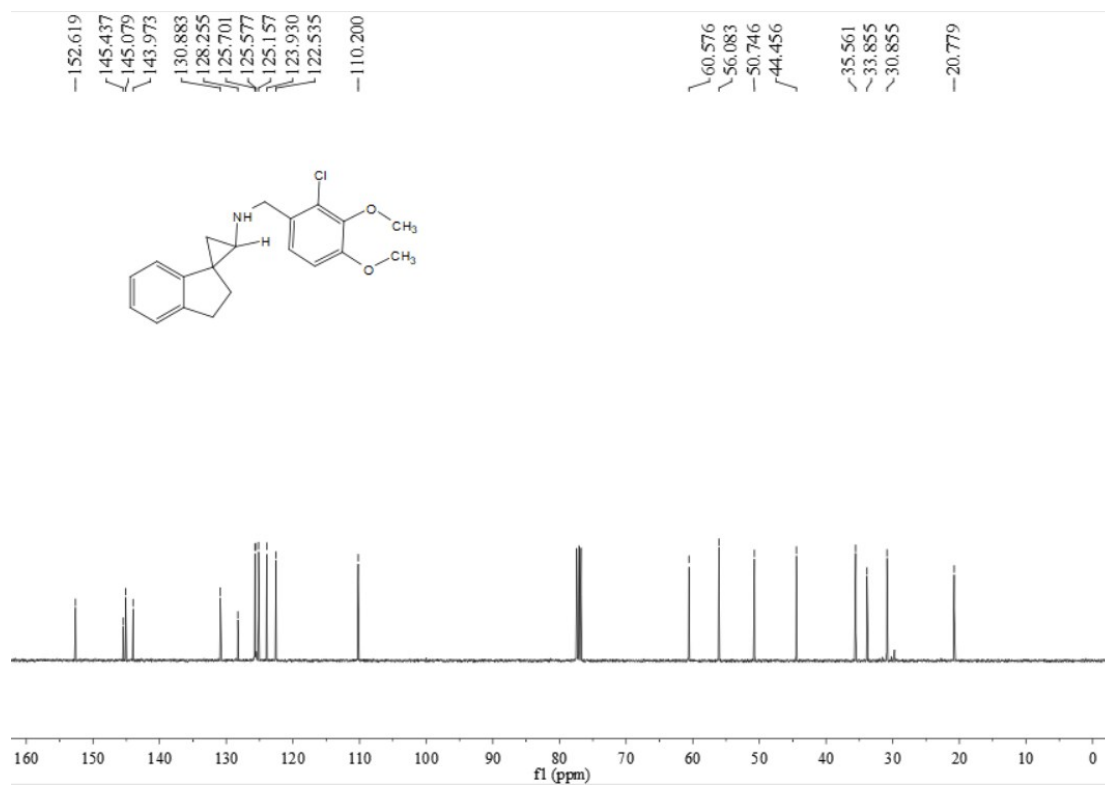

<sup>1</sup>H NMR (400 MHz, CD<sub>3</sub>OD) and <sup>13</sup>C NMR (101 MHz, CD<sub>3</sub>OD) spectrum for 21a

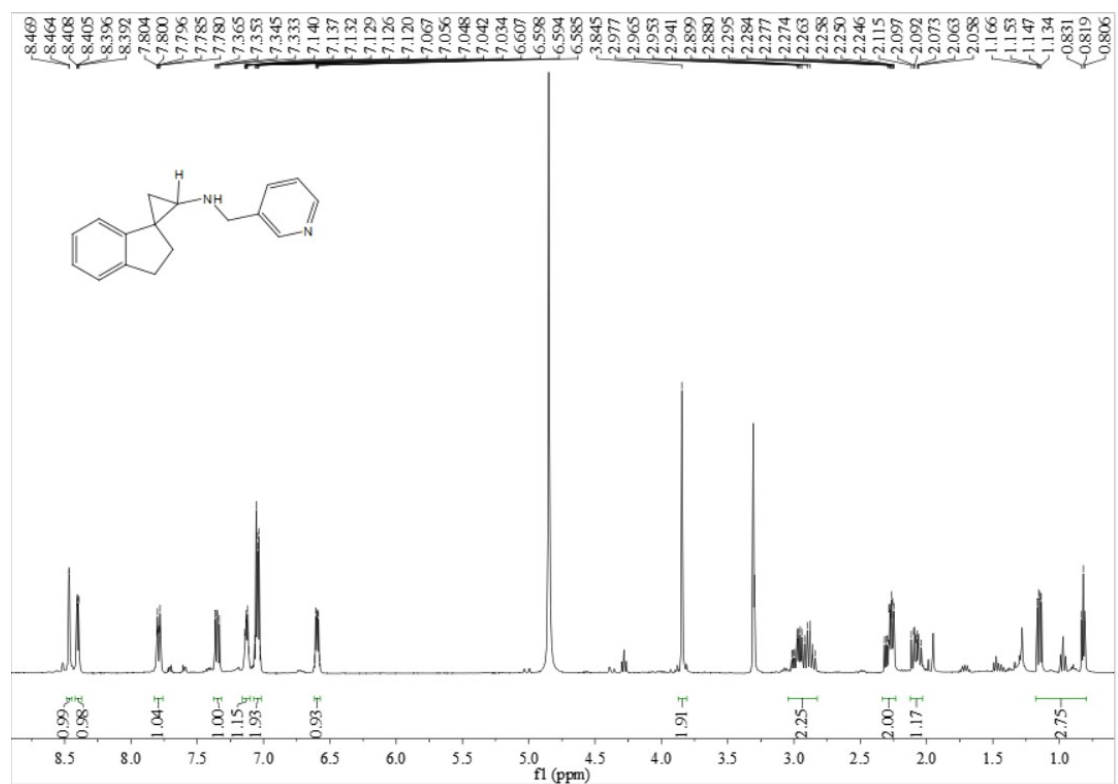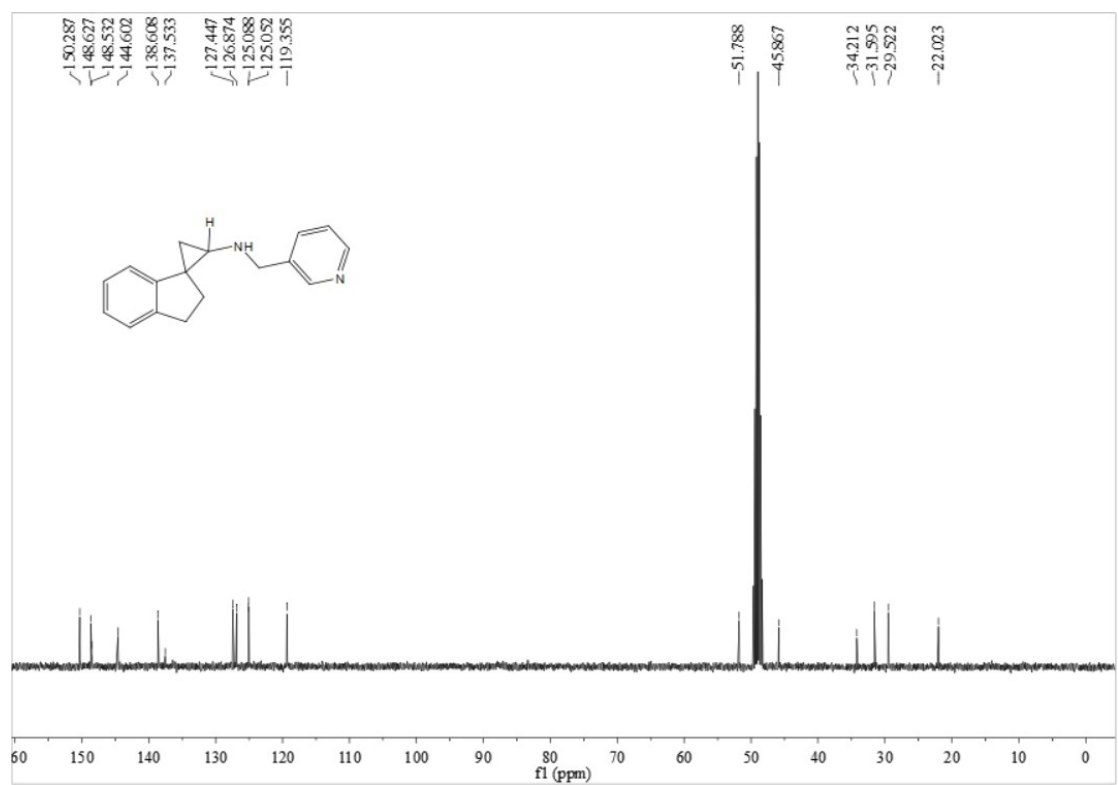

**<sup>1</sup>H NMR (400 MHz, CD<sub>3</sub>OD) and <sup>13</sup>C NMR (101 MHz, CD<sub>3</sub>OD) spectrum for 21b**

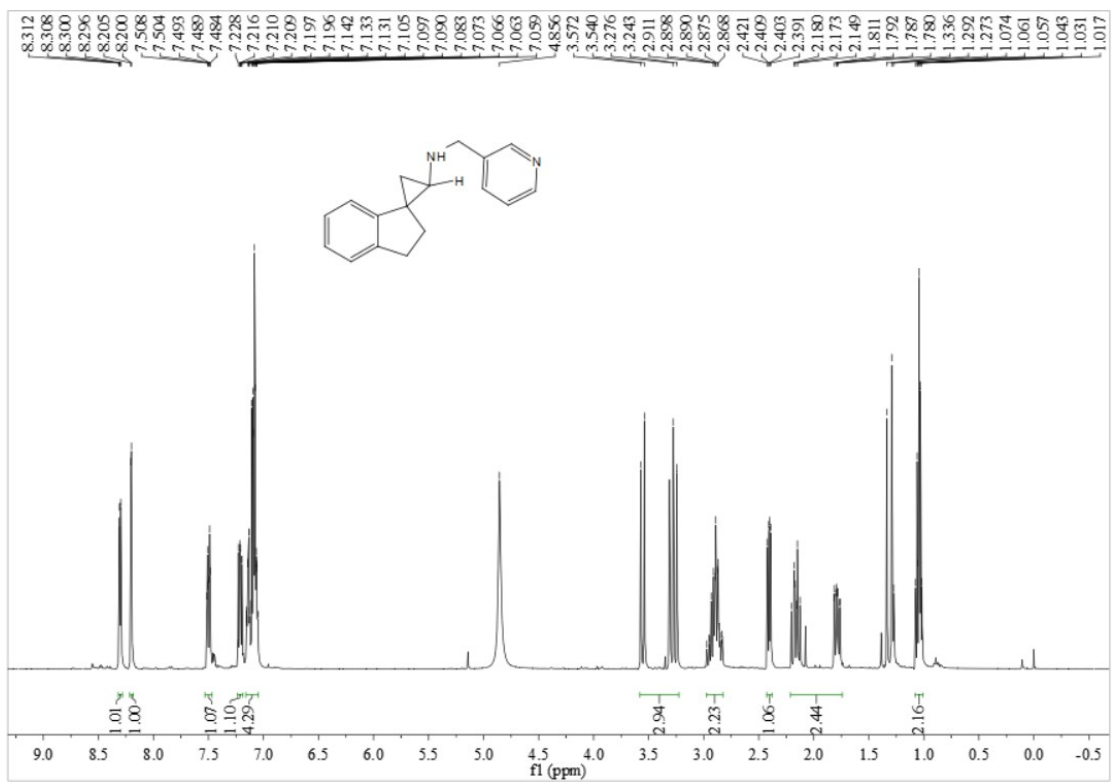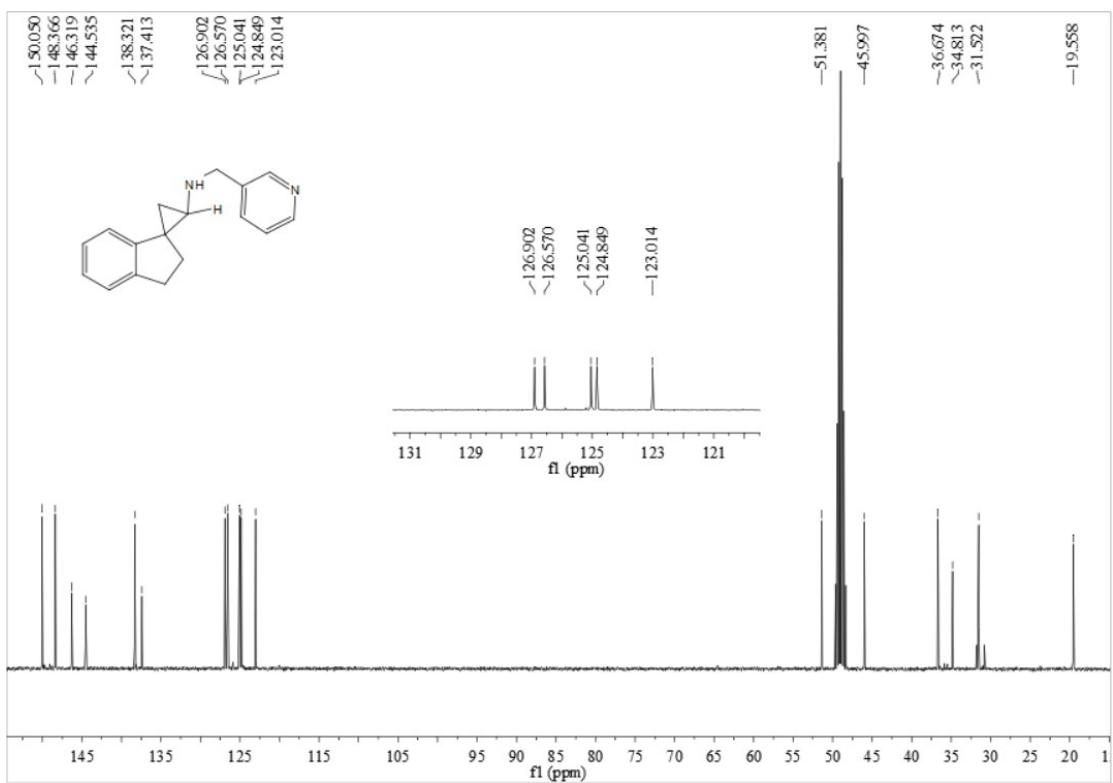

**<sup>1</sup>H NMR (400 MHz, CDCl<sub>3</sub>) and <sup>13</sup>C NMR (101 MHz, CDCl<sub>3</sub>) spectrum for 22a**



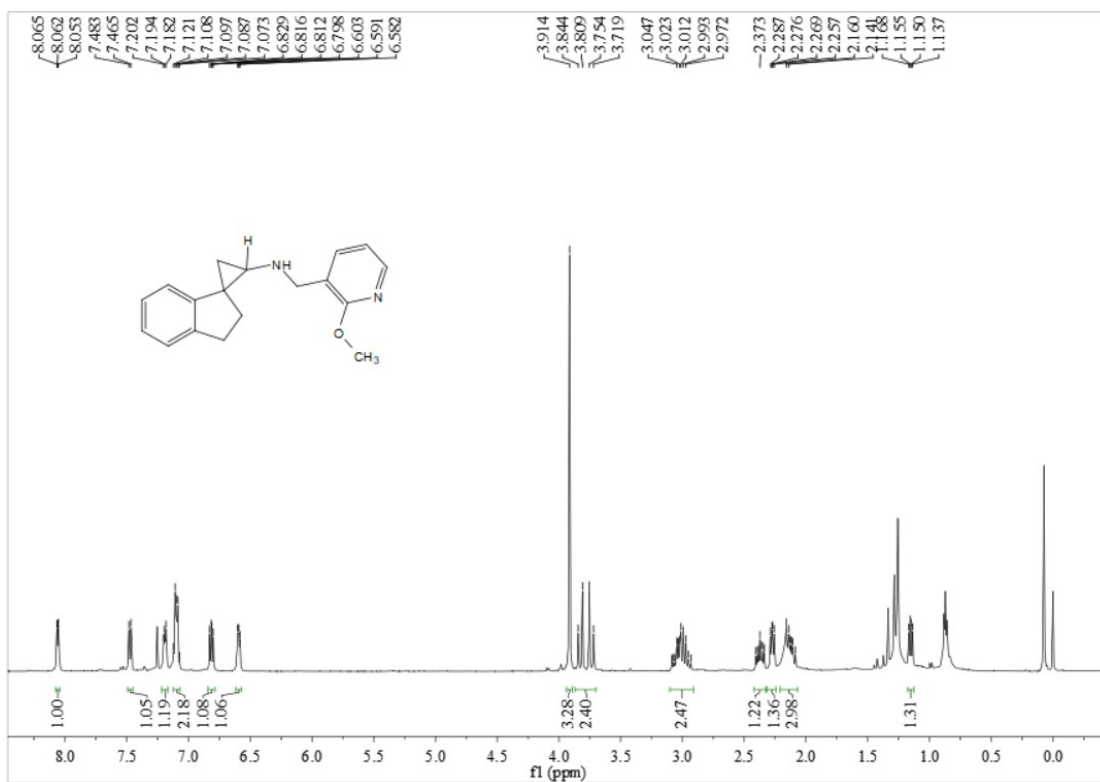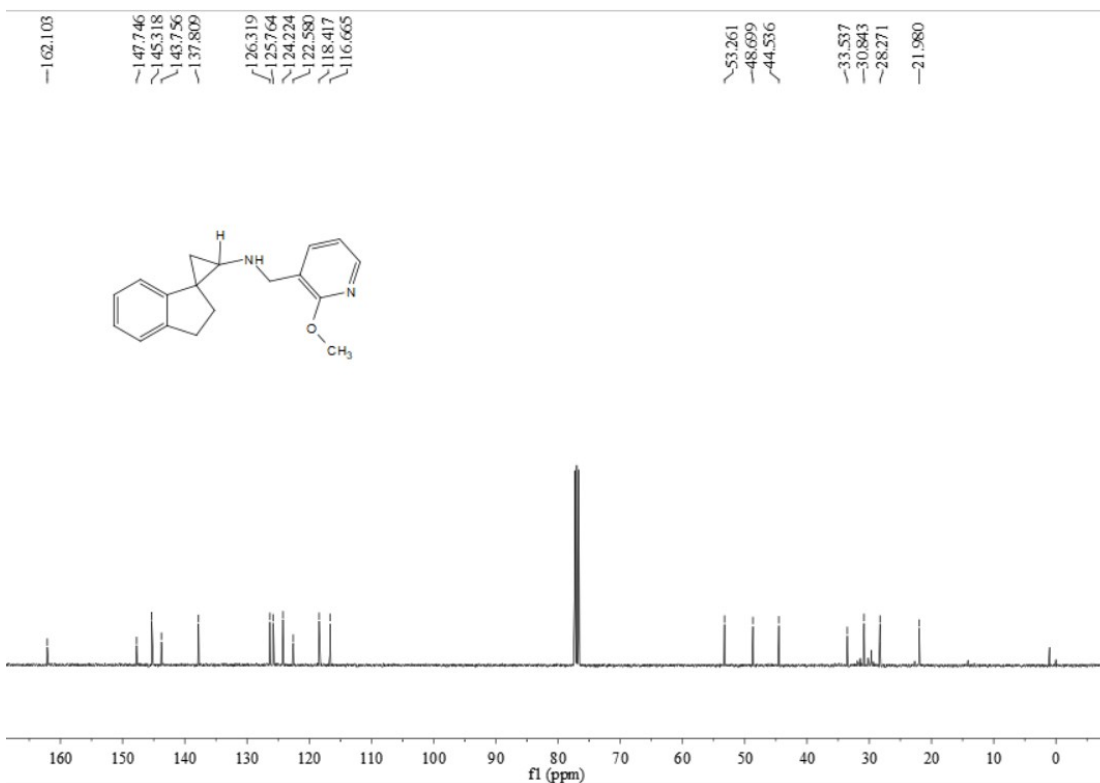

<sup>1</sup>H NMR (400 MHz, CD<sub>3</sub>OD) and <sup>13</sup>C NMR (101 MHz, CD<sub>3</sub>OD) spectrum for 22b

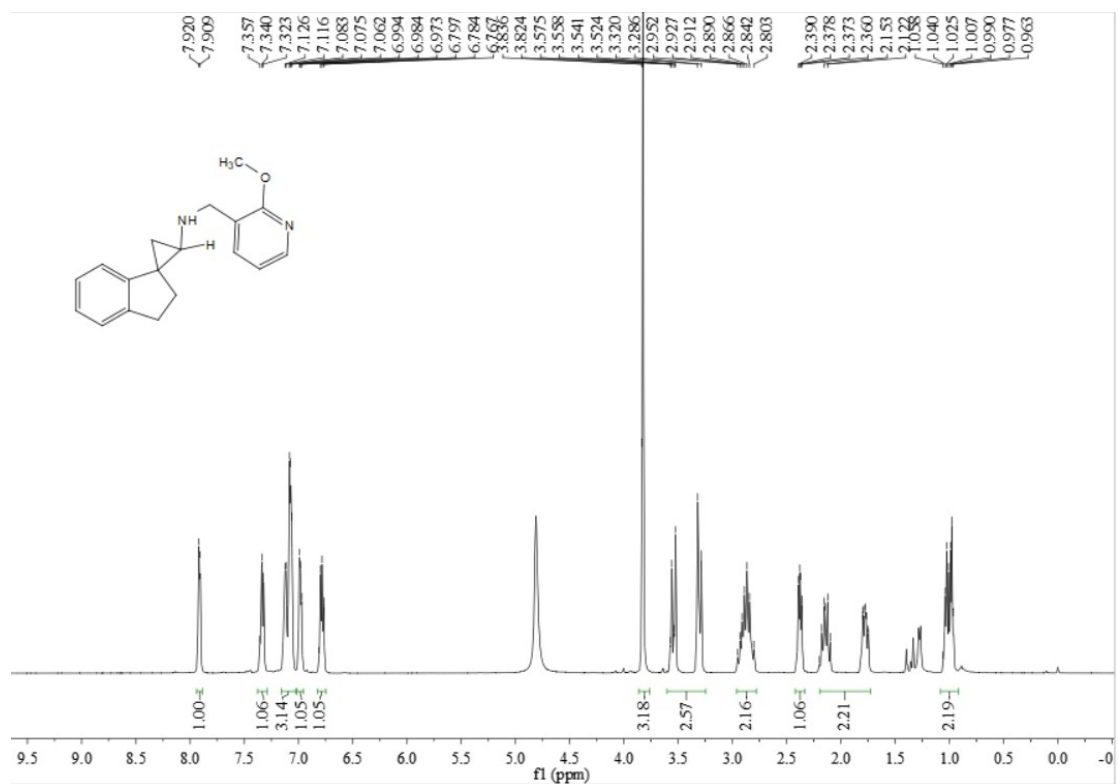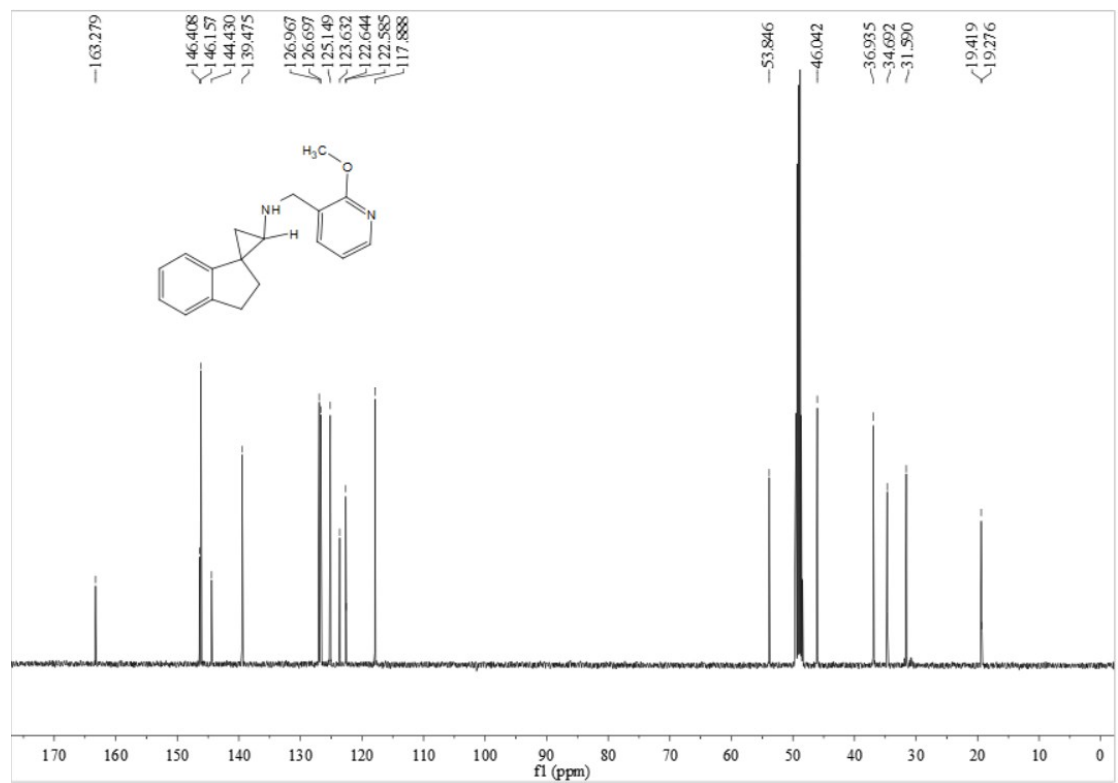

**<sup>1</sup>H NMR (400 MHz, CDCl<sub>3</sub>) and <sup>13</sup>C NMR (101 MHz, CDCl<sub>3</sub>) spectrum for 23a**

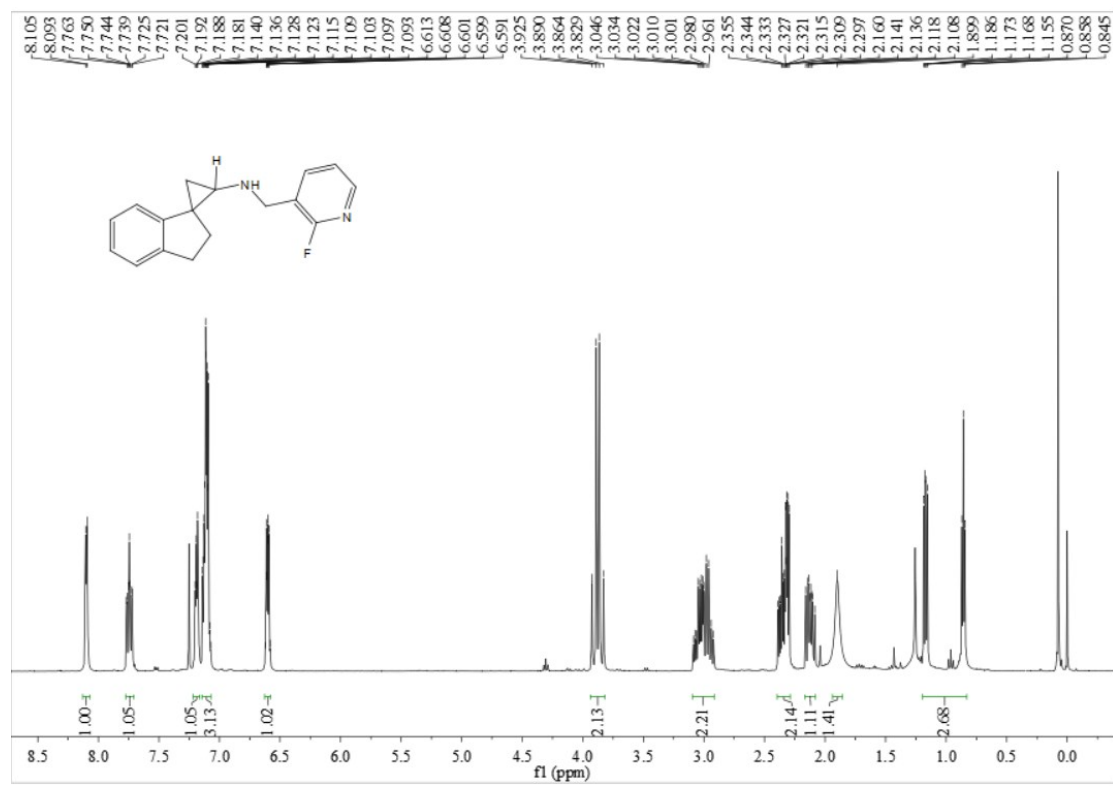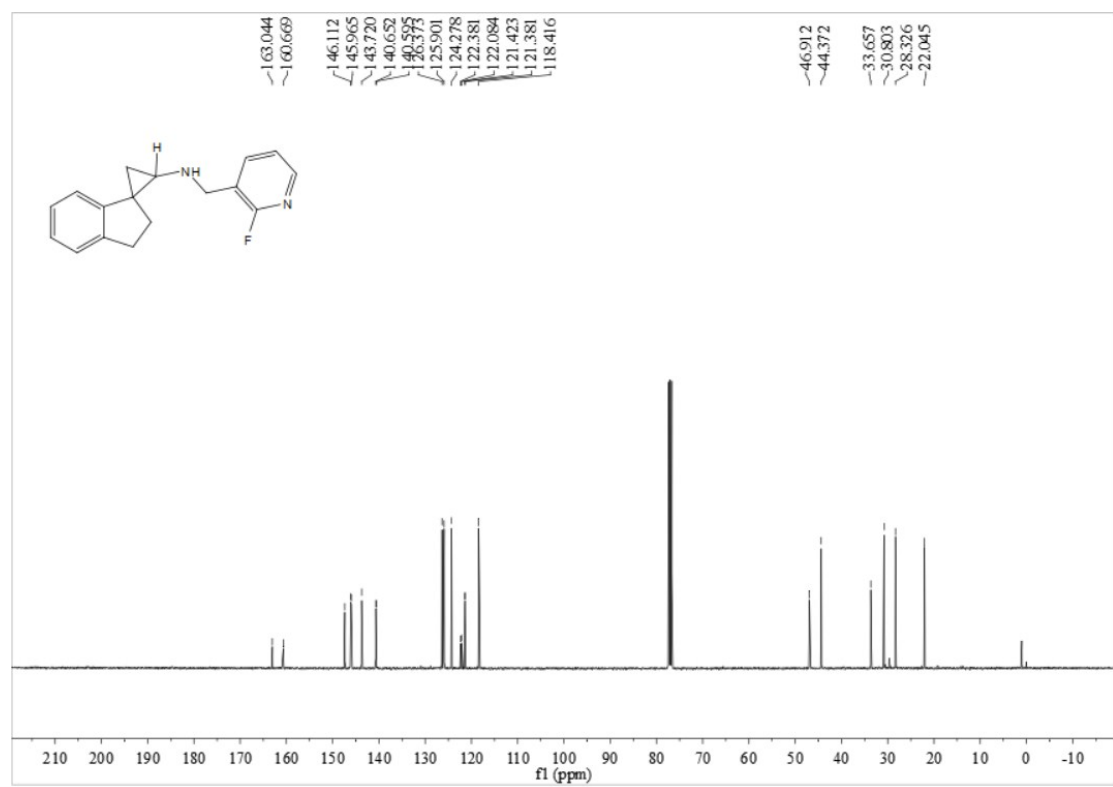

**<sup>1</sup>H NMR (400 MHz, CDCl<sub>3</sub>) and <sup>13</sup>C NMR (101MHz, CDCl<sub>3</sub>) spectrum for 23b**

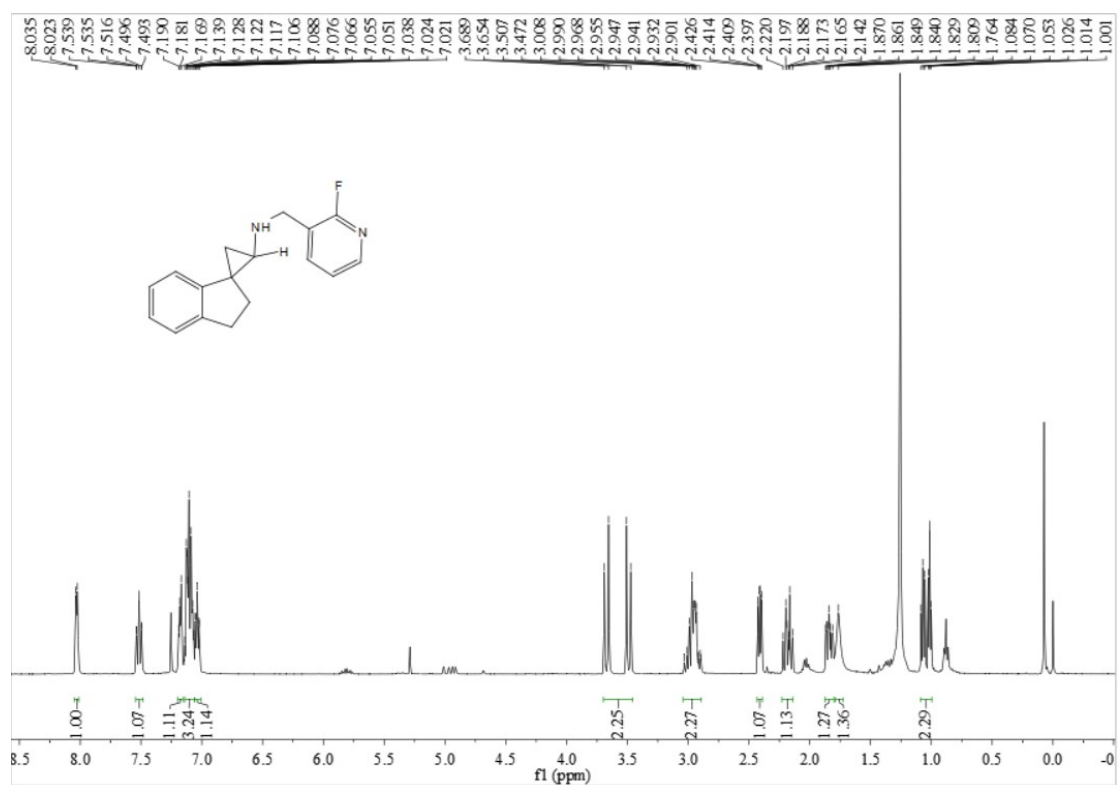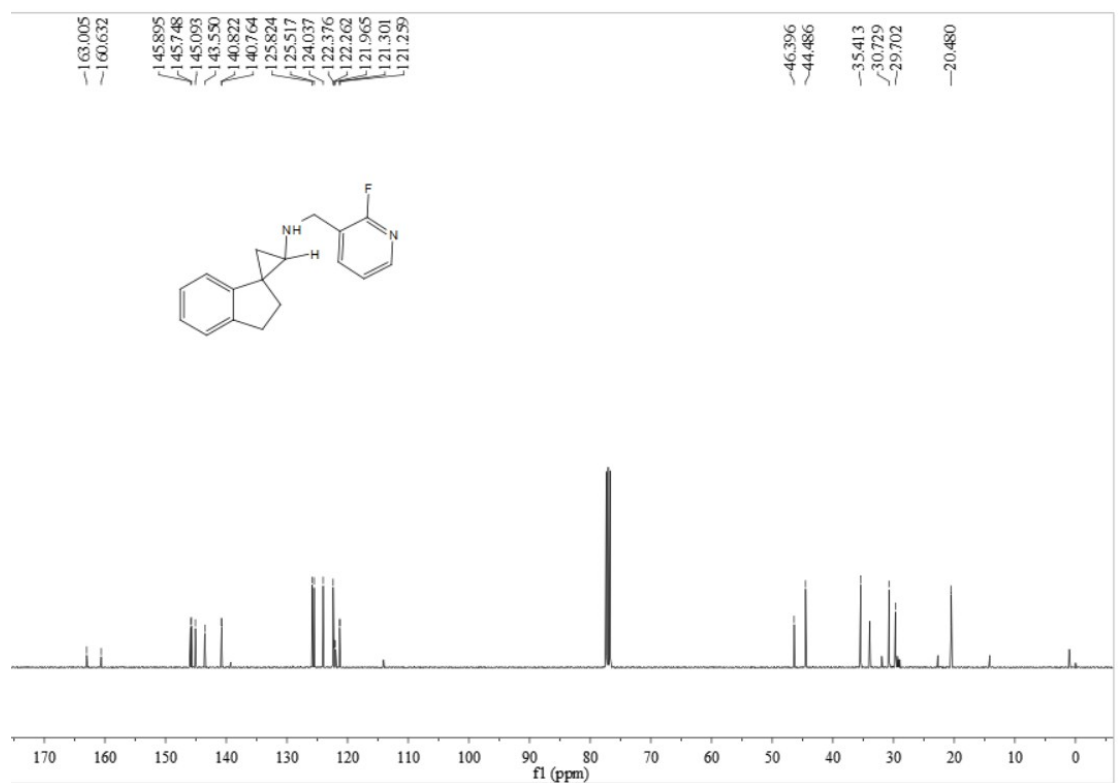

**<sup>1</sup>H NMR (400 MHz, CDCl<sub>3</sub>) and <sup>13</sup>C NMR (101 MHz, CDCl<sub>3</sub>) spectrum for 24a**

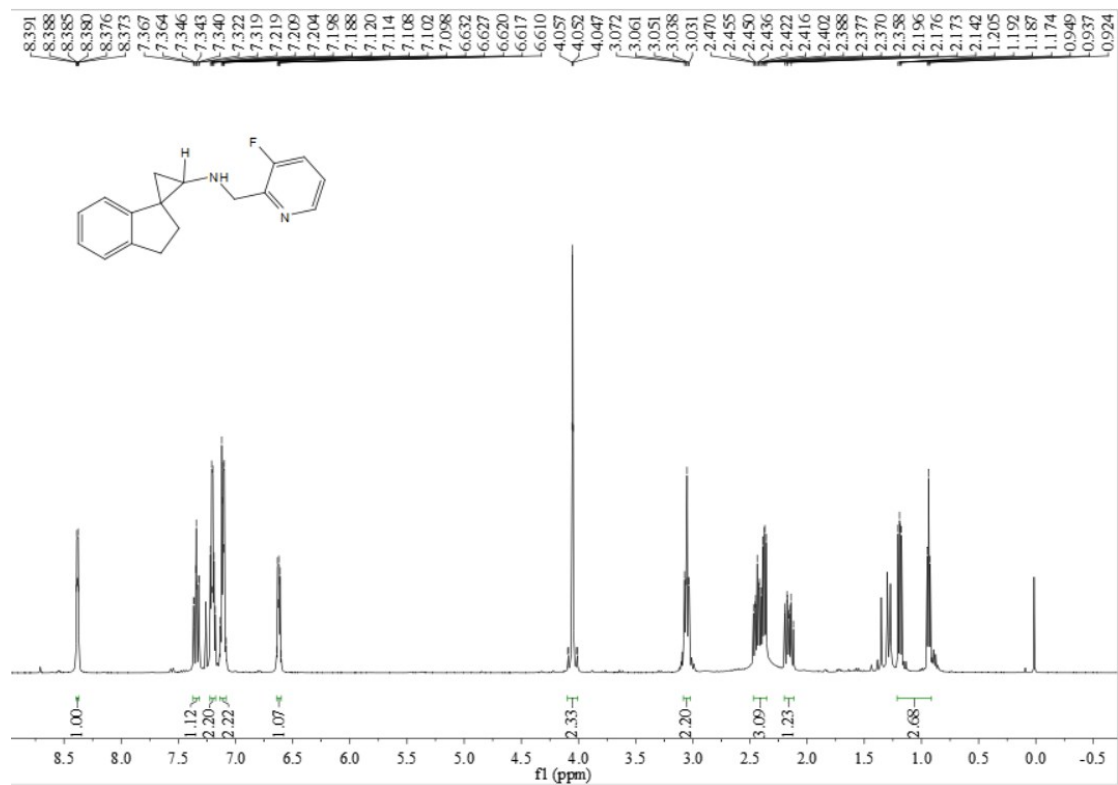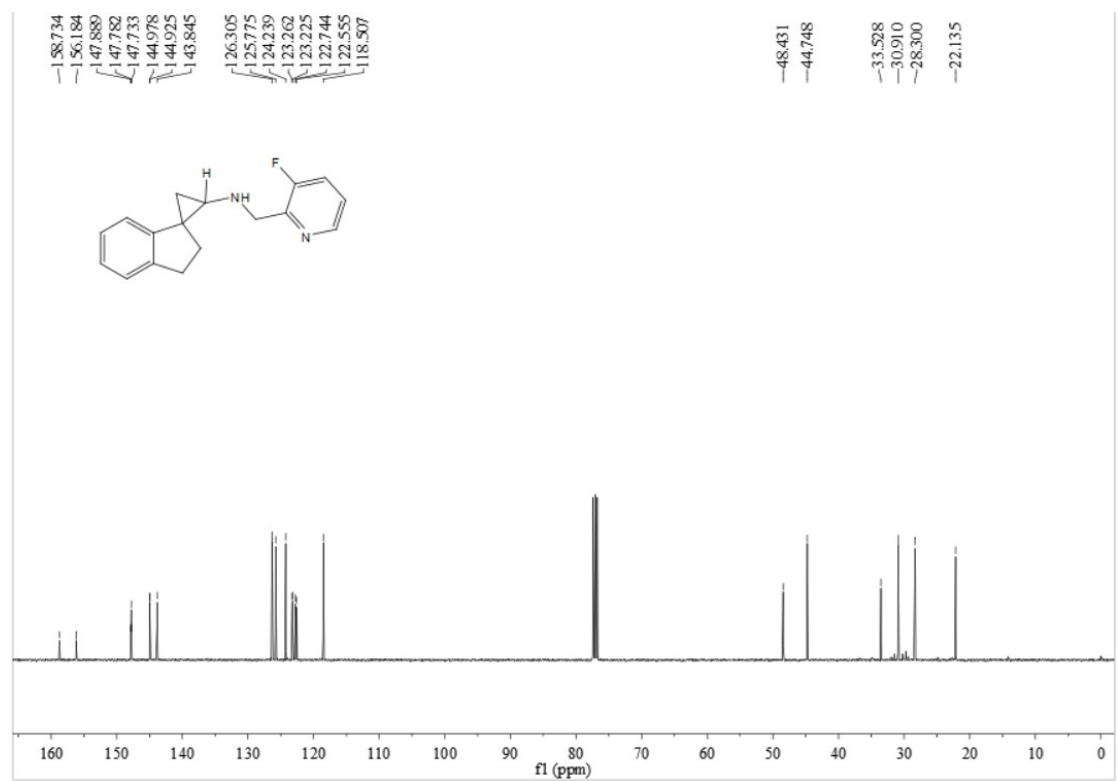

<sup>1</sup>H NMR (400 MHz, CDCl<sub>3</sub>) and <sup>13</sup>C NMR (101 MHz, CDCl<sub>3</sub>) spectrum for 24b

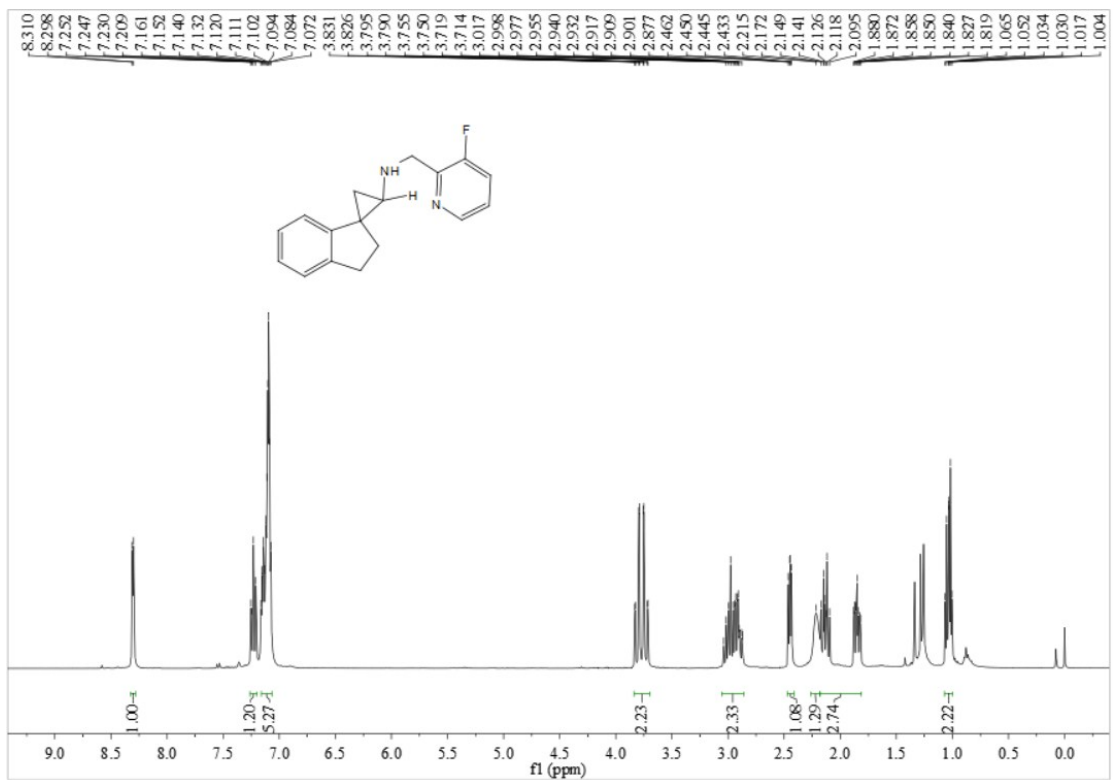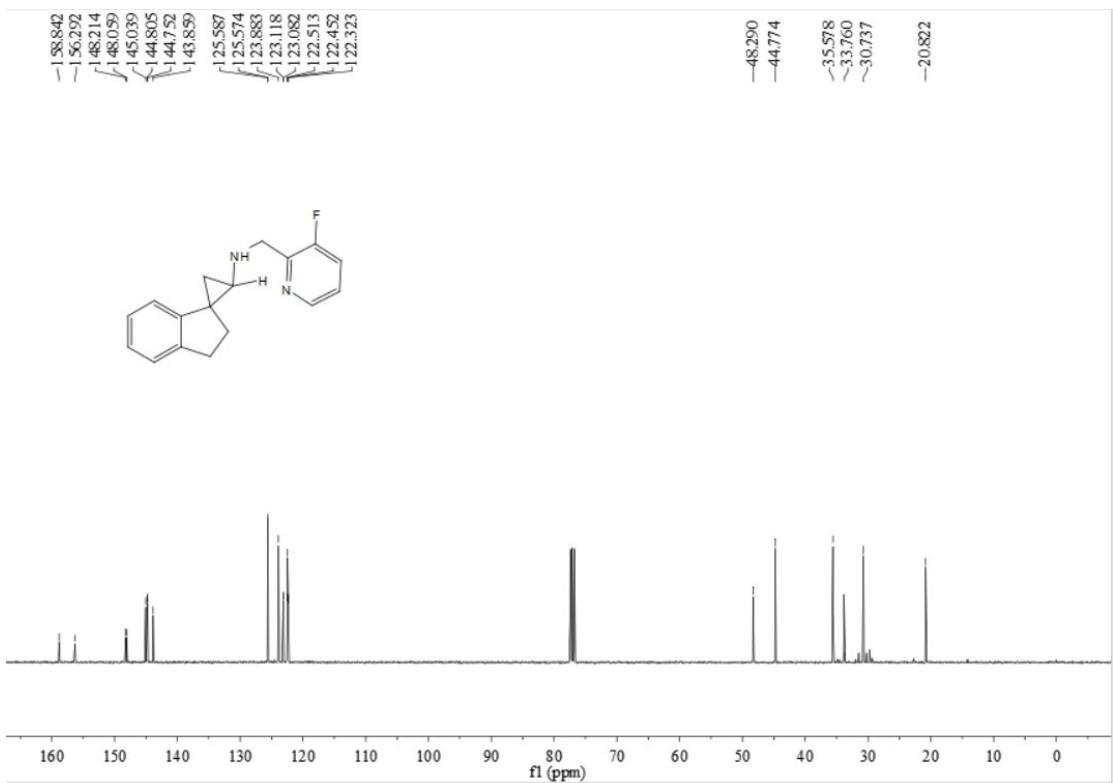

<sup>1</sup>H NMR (400 MHz, CD<sub>3</sub>OD) and <sup>13</sup>C NMR (101 MHz, CD<sub>3</sub>OD) spectrum for 25a

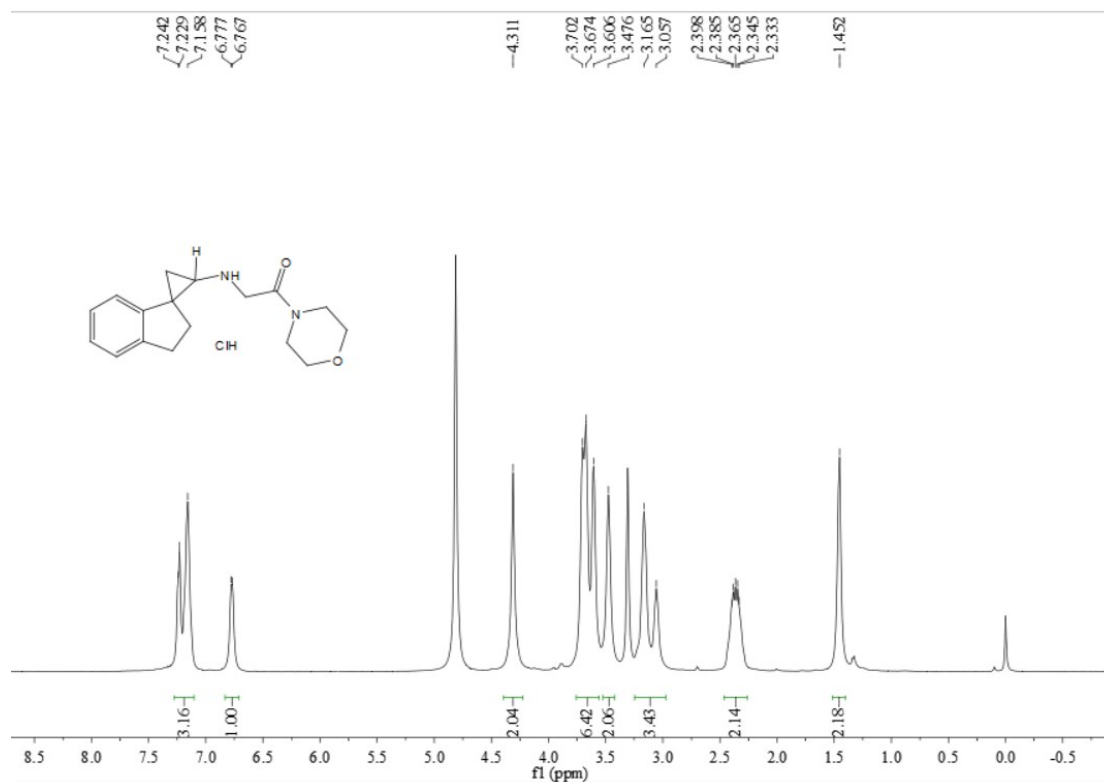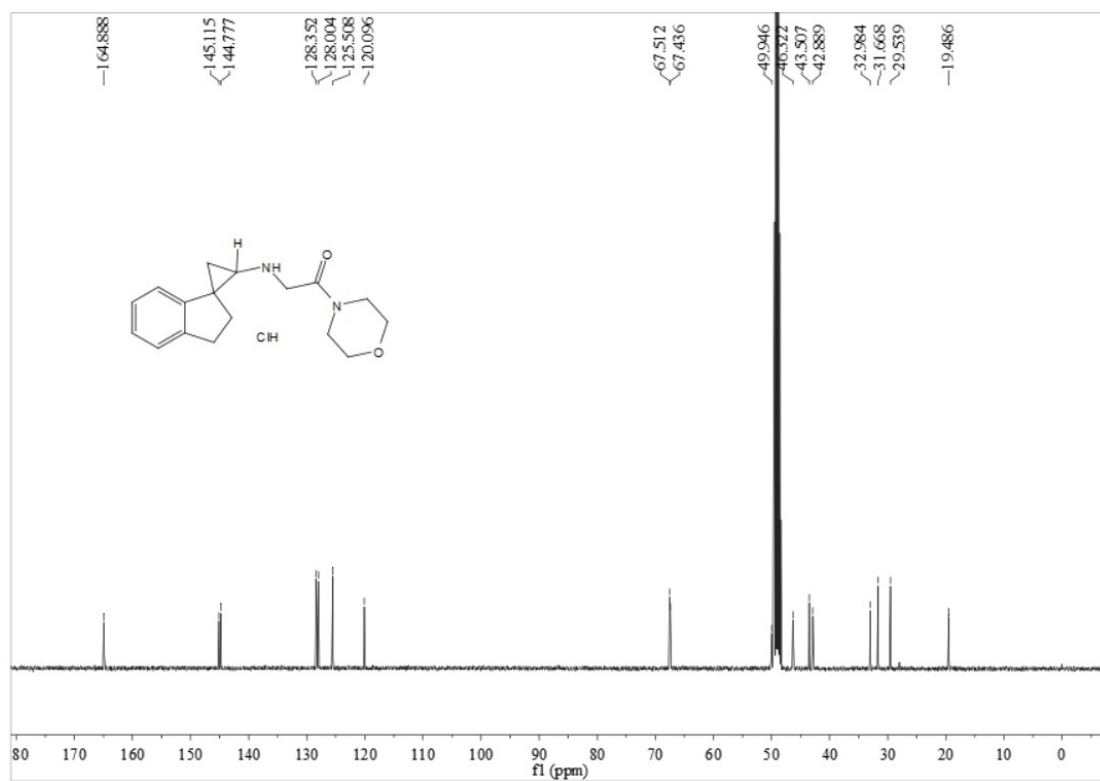

**<sup>1</sup>H NMR (400 MHz, CD<sub>3</sub>OD) and <sup>13</sup>C NMR (101 MHz, CD<sub>3</sub>OD) spectrum for 25b**

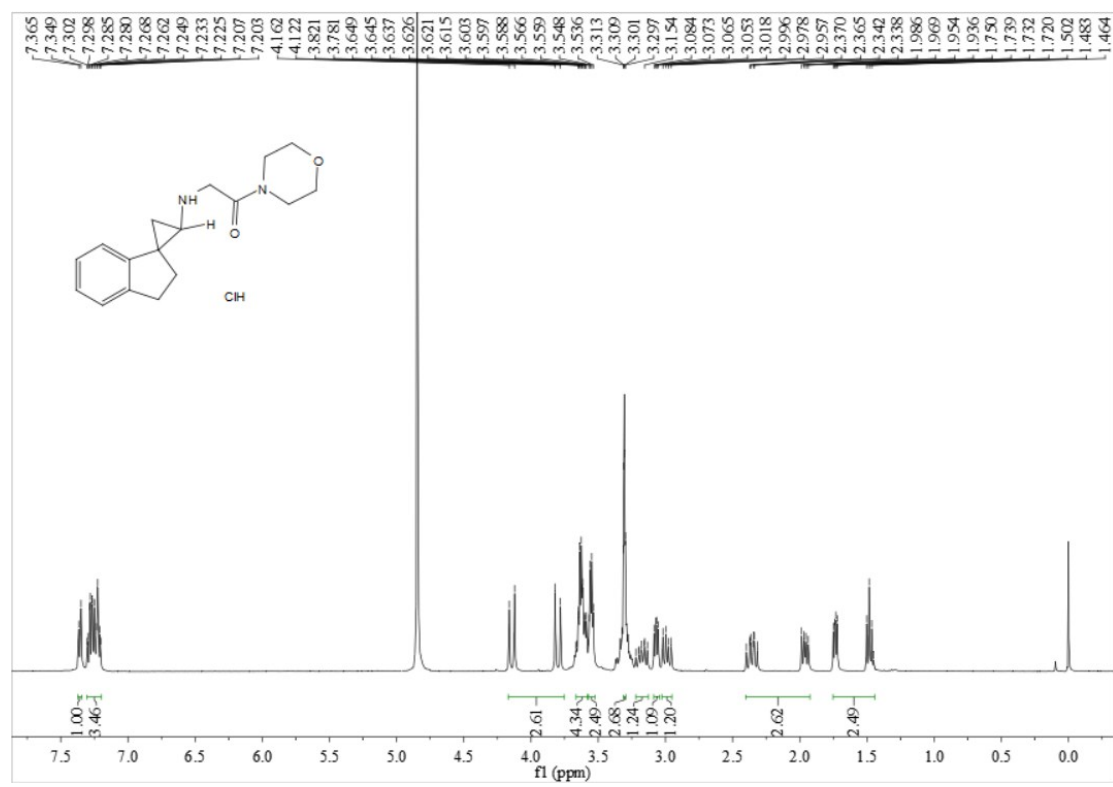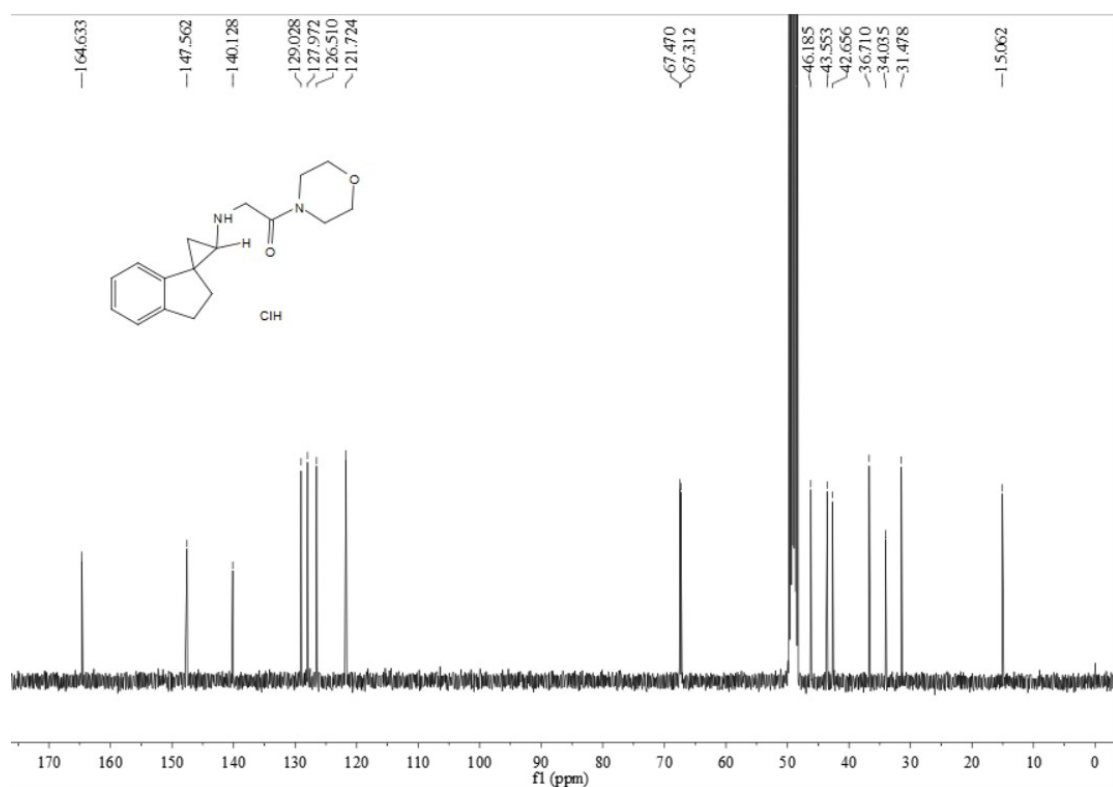

**<sup>1</sup>H NMR (400 MHz, DMSO-*d*<sub>6</sub>) and <sup>13</sup>C NMR (101 MHz, DMSO-*d*<sub>6</sub>) spectrum for 28a**



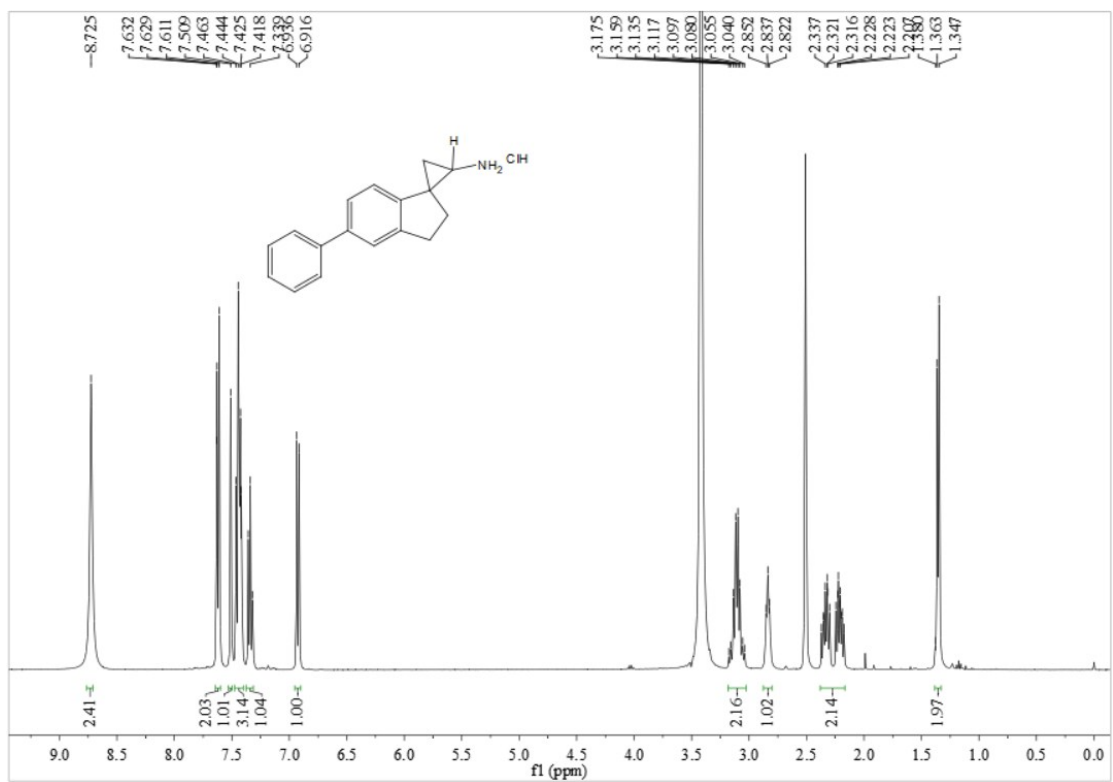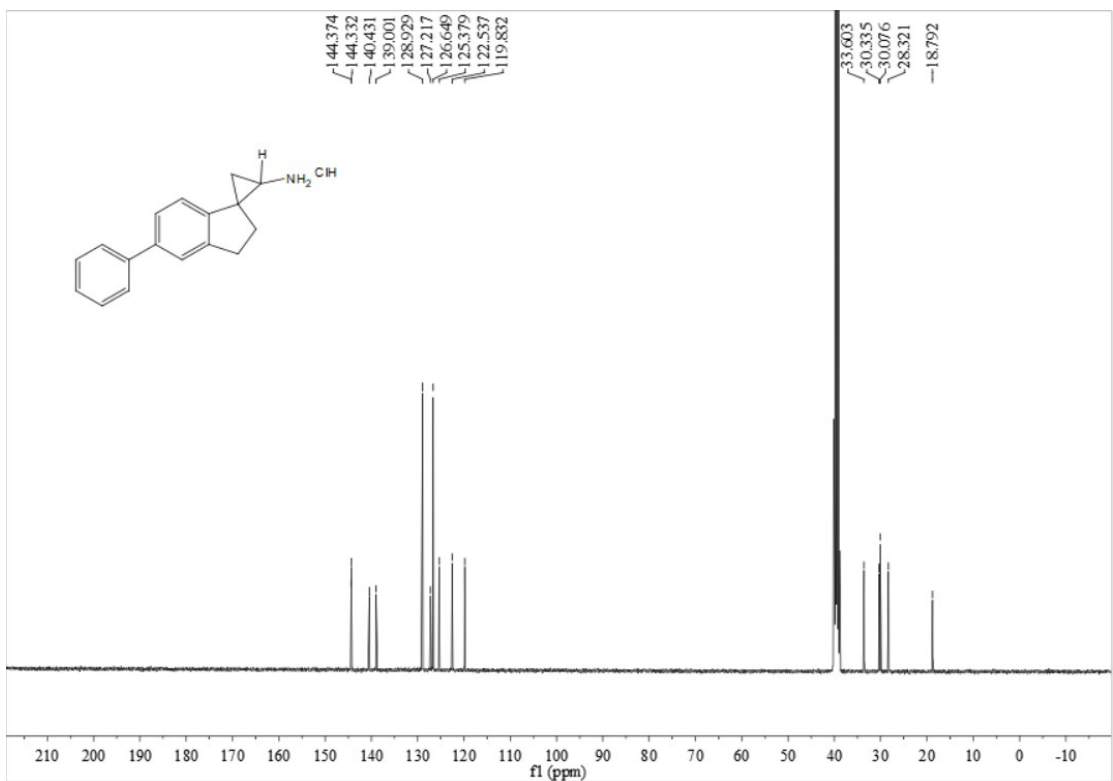

**<sup>1</sup>H NMR (400 MHz, DMSO-*d*<sub>6</sub>) and <sup>13</sup>C NMR (101 MHz, DMSO-*d*<sub>6</sub>) spectrum for 28b**

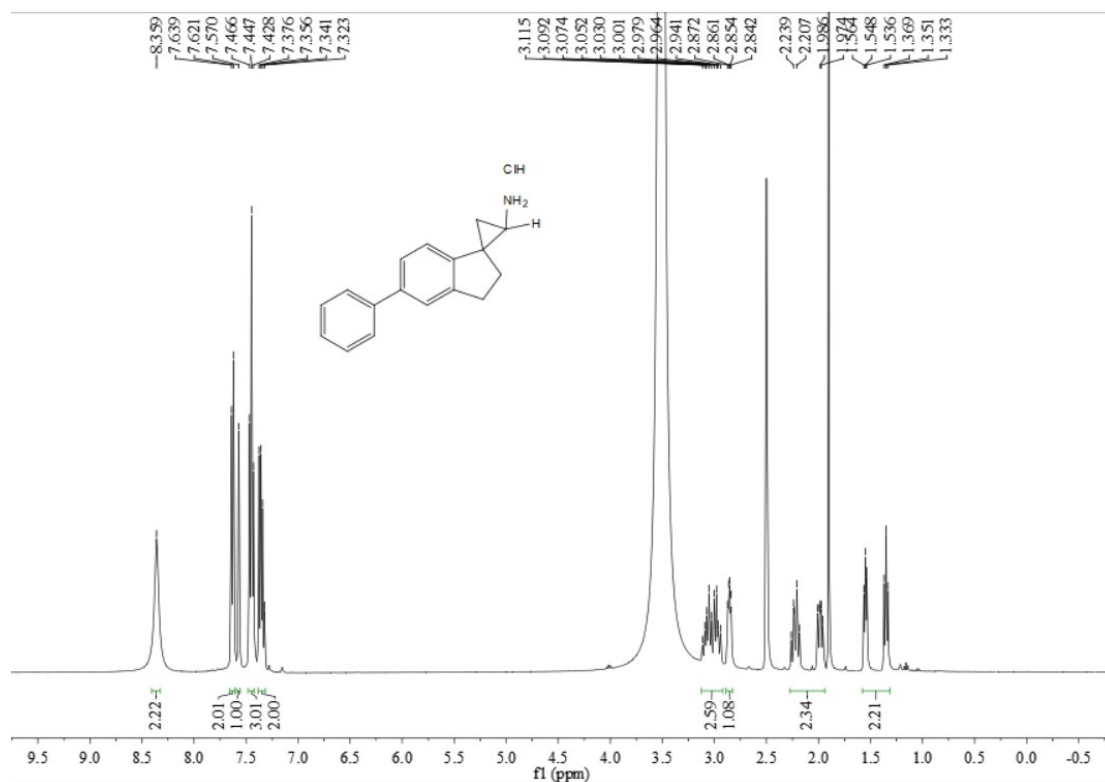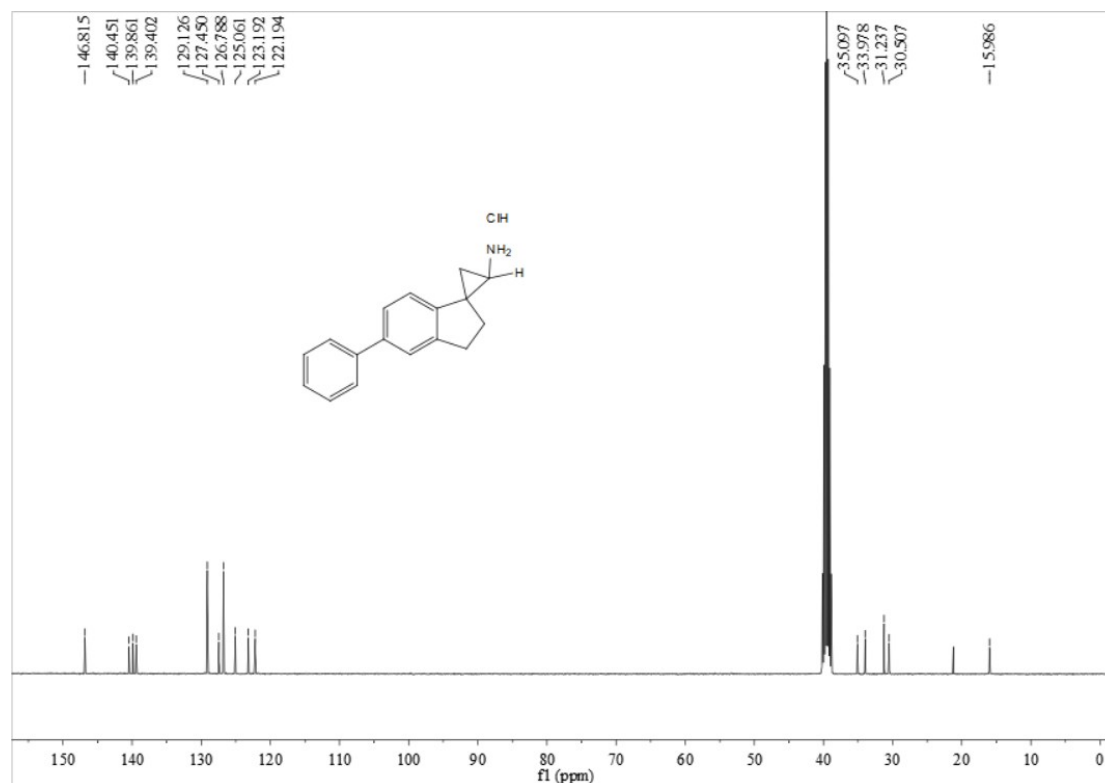

**<sup>1</sup>H NMR (400 MHz, DMSO-*d*<sub>6</sub>) and <sup>13</sup>C NMR (101 MHz, DMSO-*d*<sub>6</sub>) spectrum for 29a**

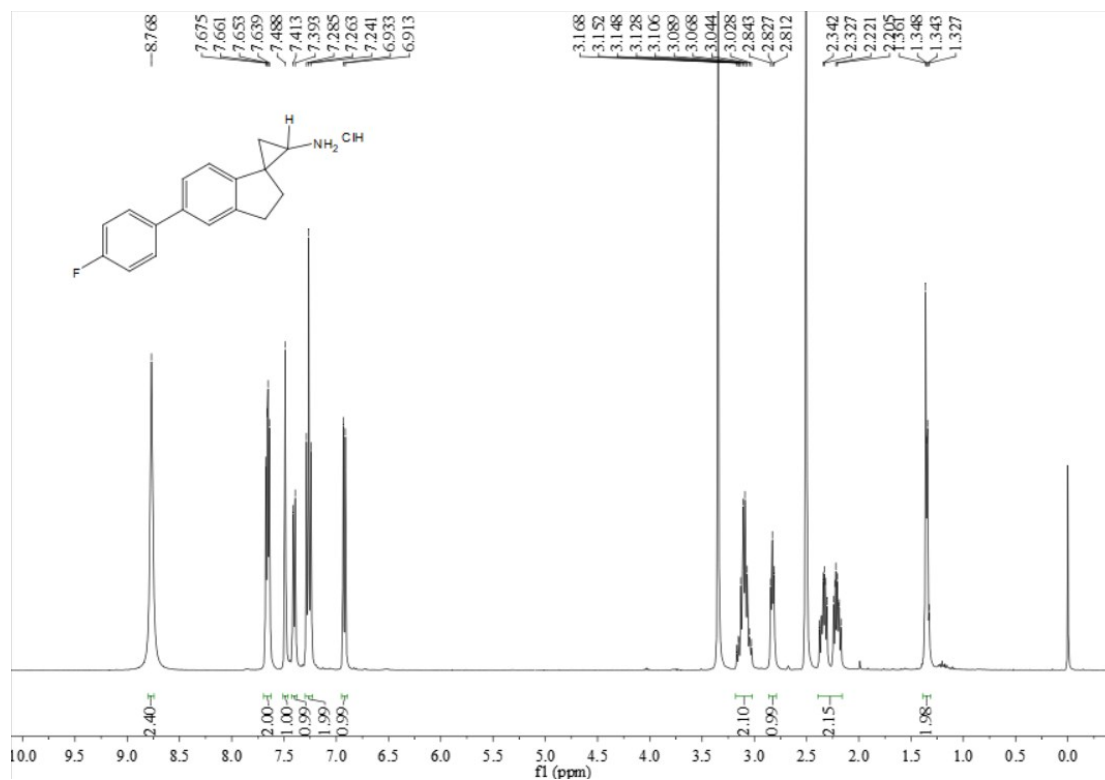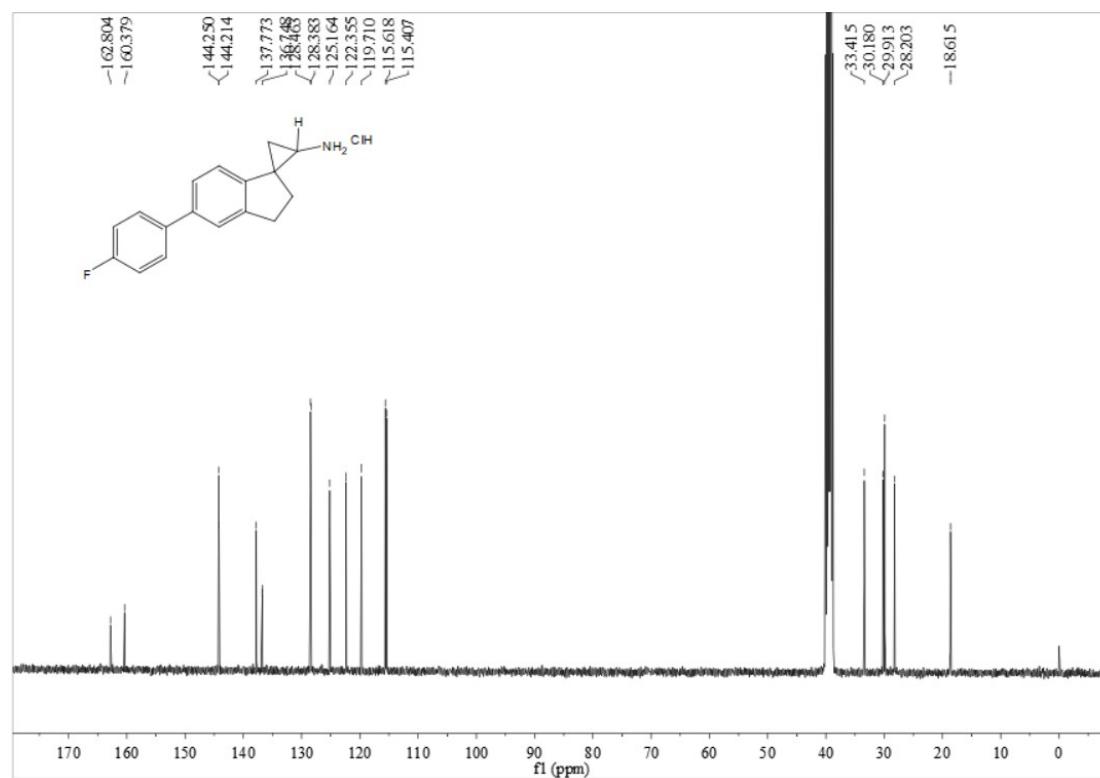

**<sup>1</sup>H NMR (400 MHz, DMSO-*d*<sub>6</sub>) and <sup>13</sup>C NMR (101 MHz, DMSO-*d*<sub>6</sub>) spectrum for 29b**

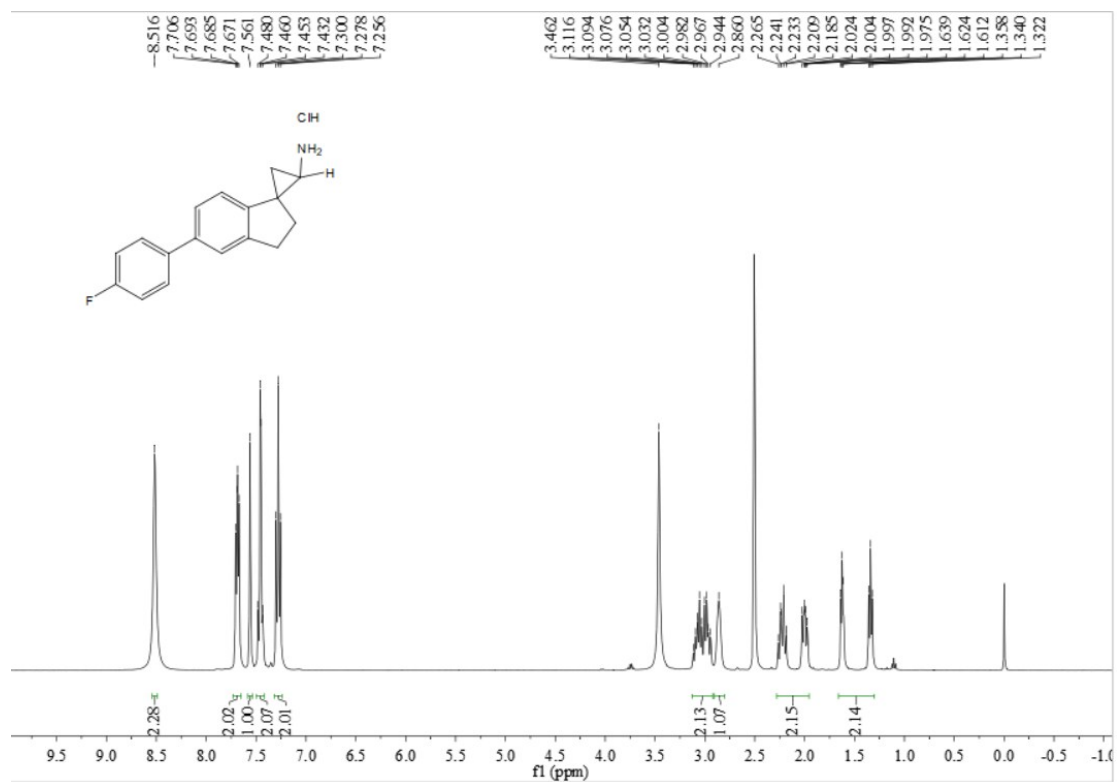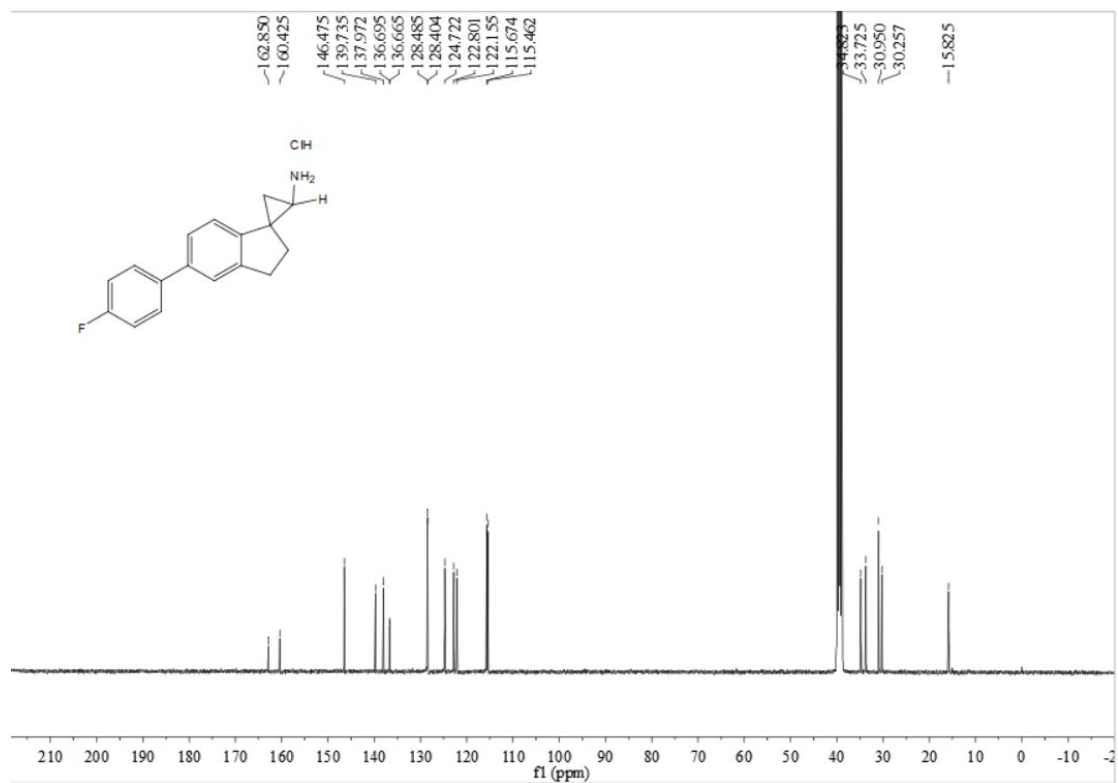

**<sup>1</sup>H NMR (400 MHz, CDCl<sub>3</sub>) and <sup>13</sup>C NMR (101 MHz, CDCl<sub>3</sub>) spectrum for 30a**

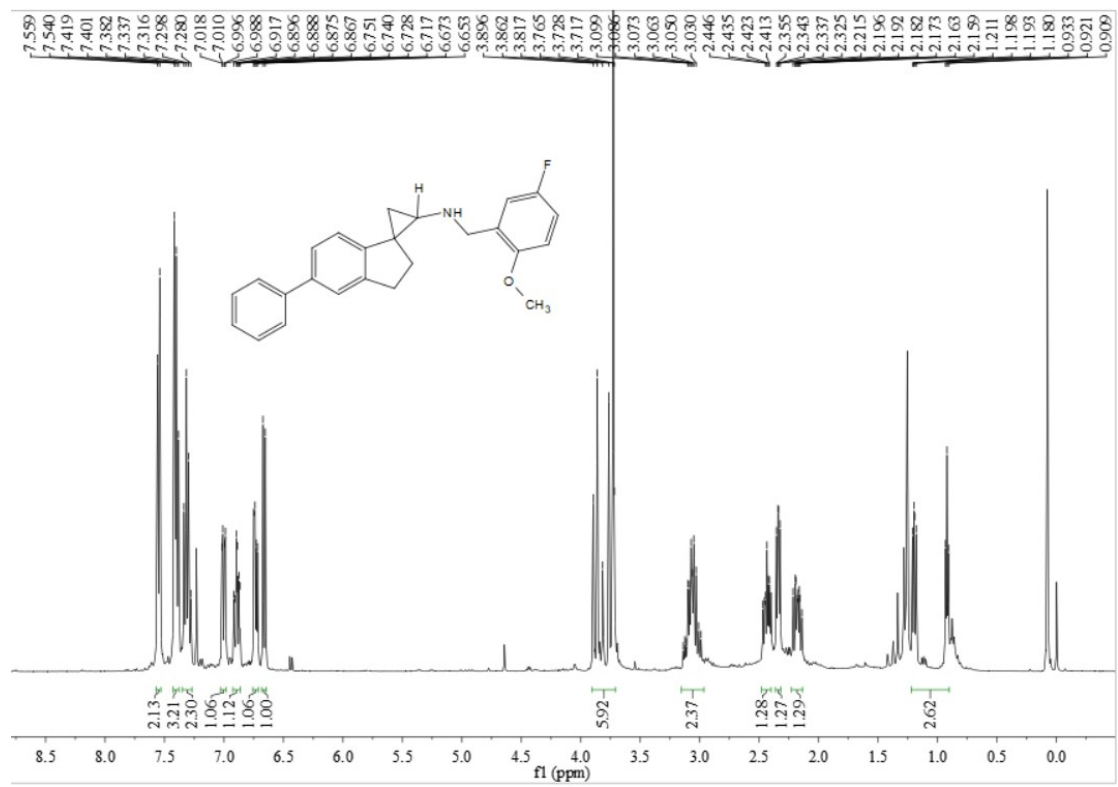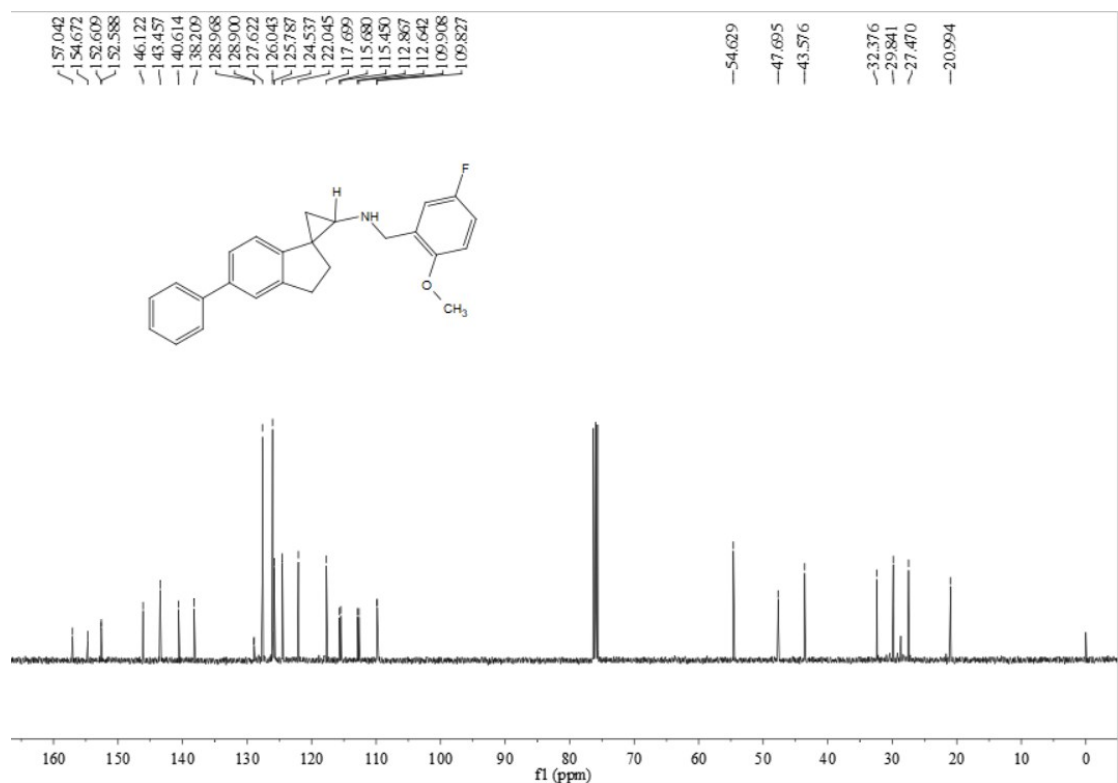

**<sup>1</sup>H NMR (400 MHz, CDCl<sub>3</sub>) and <sup>13</sup>C NMR (101 MHz, CDCl<sub>3</sub>) spectrum for 30b**

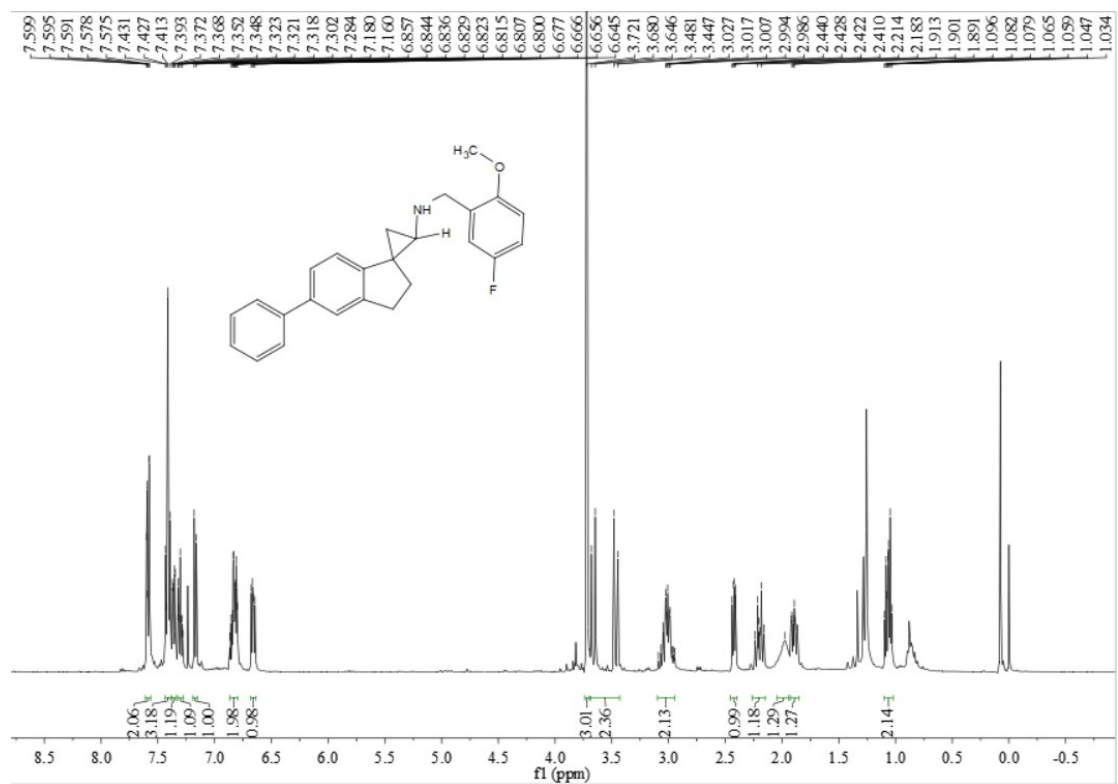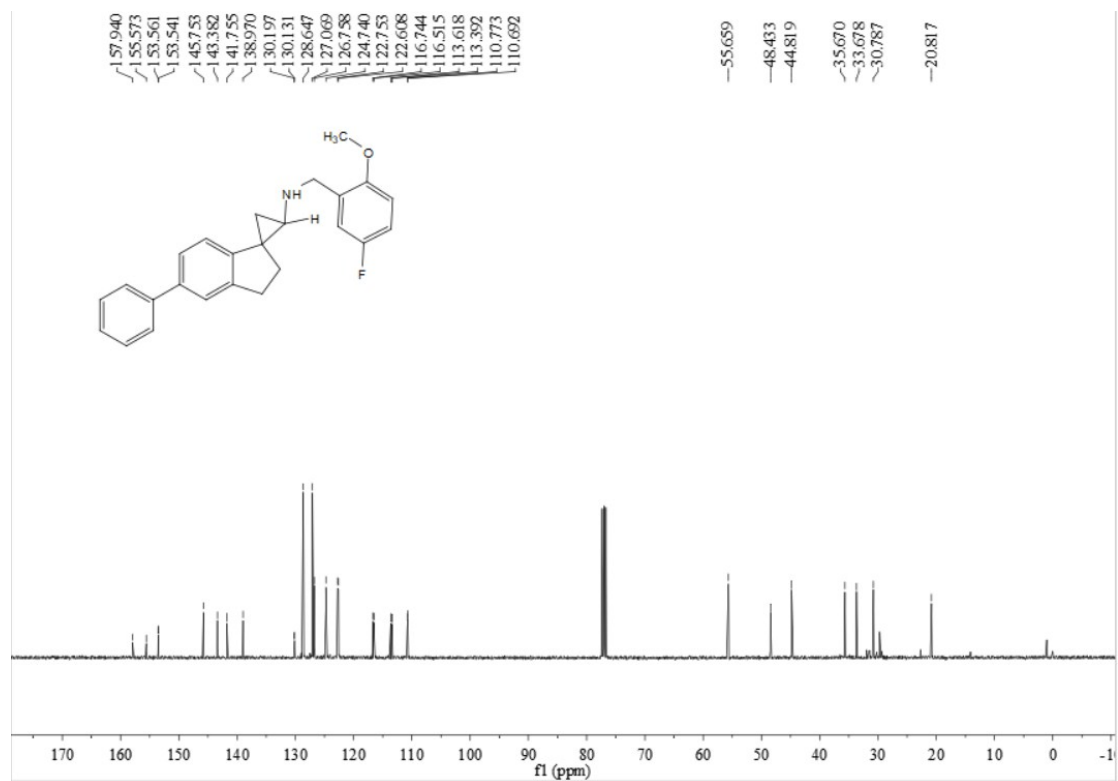

<sup>1</sup>H NMR (400 MHz, CDCl<sub>3</sub>) and <sup>13</sup>C NMR (101 MHz, CDCl<sub>3</sub>) spectrum for 31a

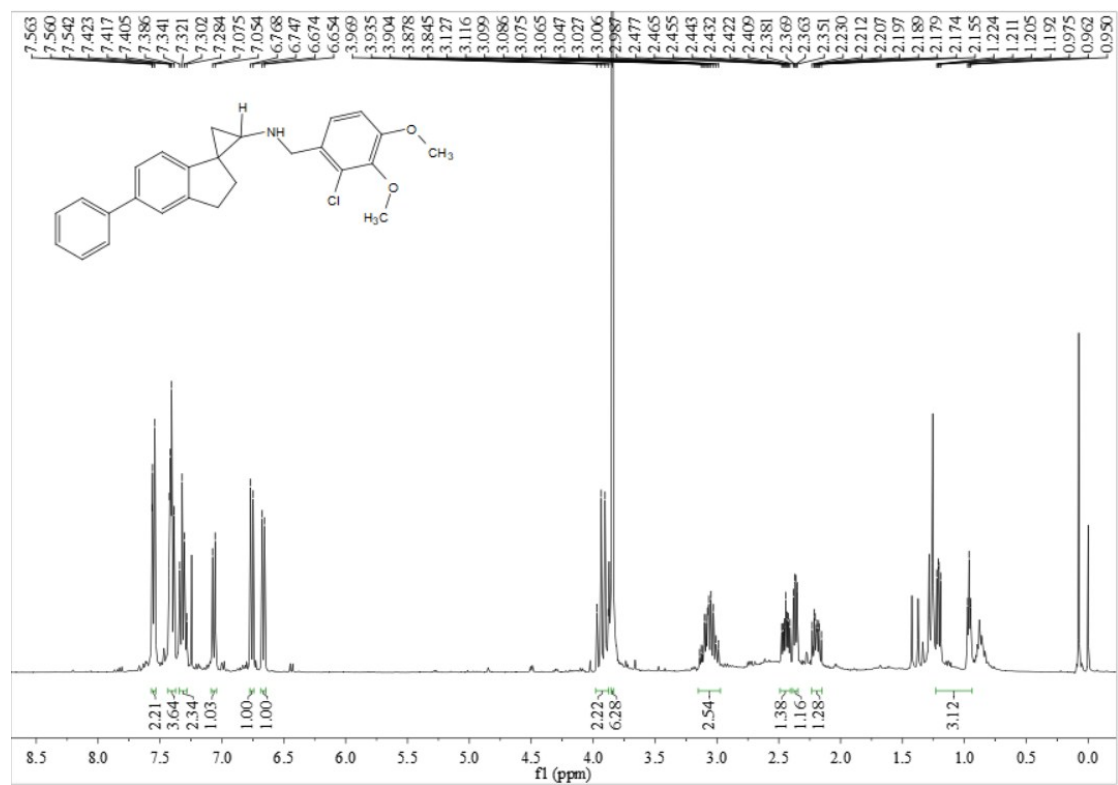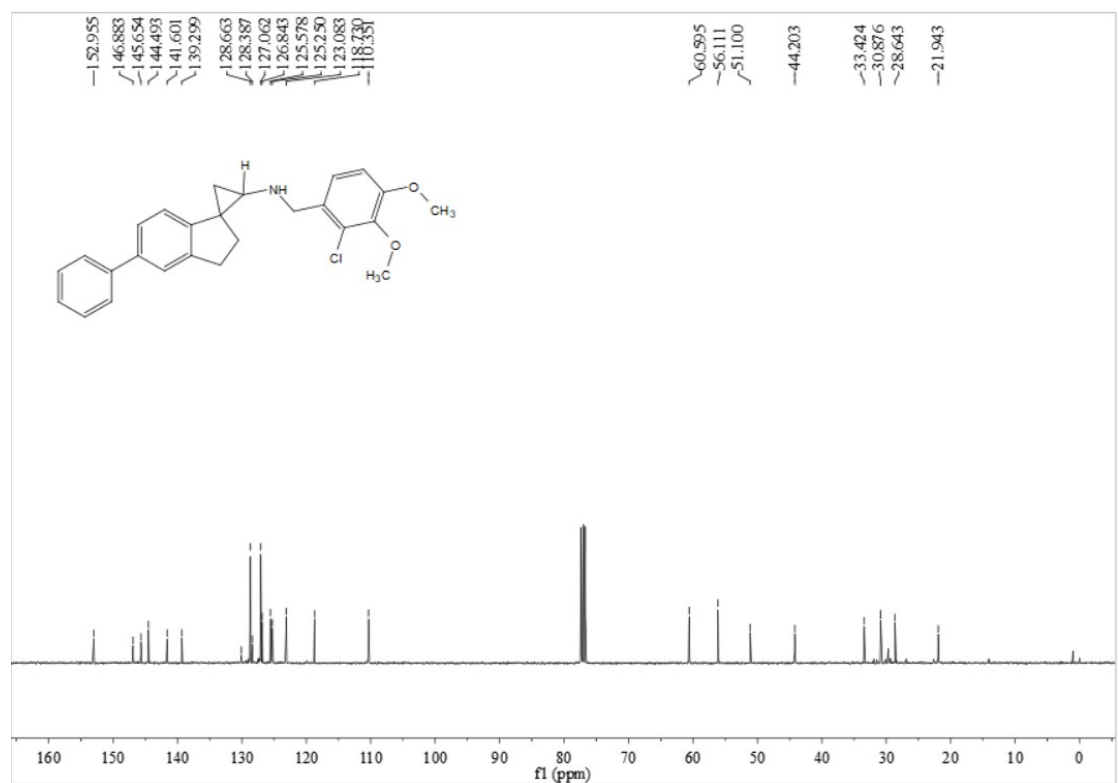

<sup>1</sup>H NMR (400 MHz, CDCl<sub>3</sub>) and <sup>13</sup>C NMR (101 MHz, CDCl<sub>3</sub>) spectrum for 32a

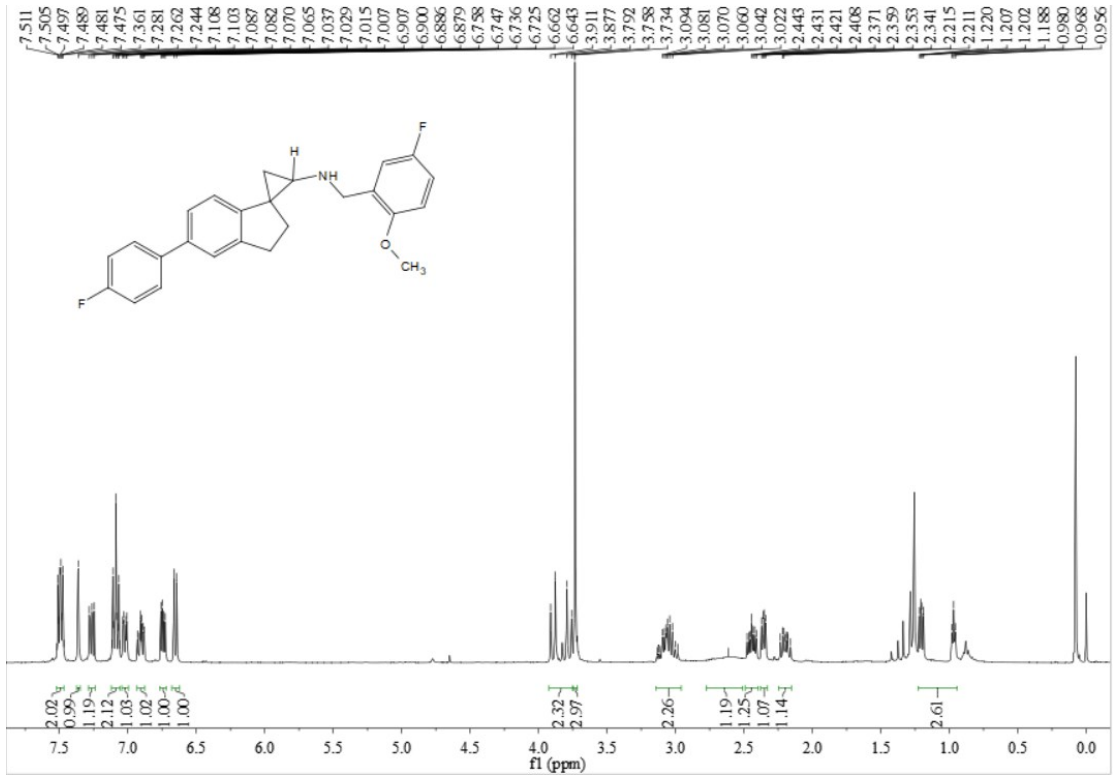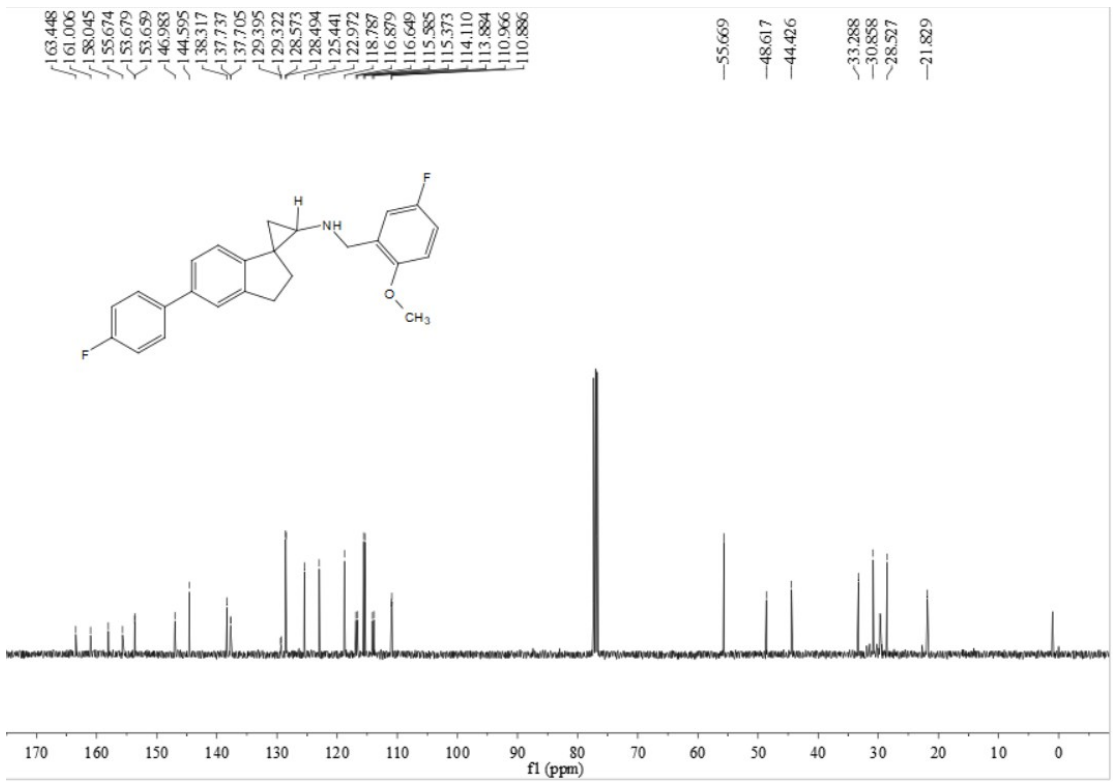

Supplement: RA-008-C7RA13097J-s001.pdf [file RA-008-C7RA13097J-s001.pdf]
